# Supplementary material for: Preterm delivery rate in China: a systematic review and meta-analysis
Source: PubMed Central journal article supplement (PMC9063297; doi:10.1186/s12884-022-04713-z), 2022-05-02
Supplement: 12884_2022_4713_MOESM1_ESM.pdf [file 12884_2022_4713_MOESM1_ESM.pdf]

# Supplementary appendix

## Content

|                                                                                    |           |
|------------------------------------------------------------------------------------|-----------|
| <b>eText1. Full search strategy.....</b>                                           | <b>2</b>  |
| <b>eText2. List of included studies (n=162).....</b>                               | <b>3</b>  |
| <b>eTable1 PRISMA Checklist.....</b>                                               | <b>14</b> |
| <b>eTable2. Characteristics of included studies (n=162) .....</b>                  | <b>16</b> |
| <b>eTable3. Study quality assessment (n=162) .....</b>                             | <b>26</b> |
| <b>eTable4. Stratified analysis within population-based studies (n=37).....</b>    | <b>36</b> |
| <b>eTable5. Stratified analysis within hospital-based studies (n=124) .....</b>    | <b>38</b> |
| <b>eTable6. Province-level pooled rates and nationwide weighted rate .....</b>     | <b>40</b> |
| <b>eFigure1. Forest plot of all the included studies (n=161) .....</b>             | <b>42</b> |
| <b>eFigure2. Sensitivity analysis within population-based studies (n=37) .....</b> | <b>43</b> |

## eText1. Full search strategy

### PubMed

preterm birth[MeSH Terms] AND China[MeSH Terms] AND (incidence[MeSH Terms] OR risk factors[MeSH Terms] OR prevalence[MeSH Terms])

### Embase

All field preterm OR pre-term OR premature OR pre-mature OR prematuritas OR prematurity OR pre-maturity

AND All field birth OR childbirth OR deliver OR delivery OR labor OR labour

AND Title or Abstract China OR Chinese

AND All field prevalence OR incidence OR rate OR risk factors

### Web of Science

TS= ((preterm OR pre-term OR premature OR pre-mature OR prematuritas OR prematurity OR pre-maturity) AND (birth OR childbirth OR deliver OR delivery OR labor OR labour) AND ((prevalence OR incidence OR rate) OR risk factors)) AND TI= (China OR Chinese)

### China National Knowledge Infrastructure

SU = ('流行'+'发生率'+ '影响因素'+ '出生结局') AND(TI='早产' OR KY='早产')

### China Science and Technology Journal Database

M=早产 AND (U=流行 OR U=发生率 OR U=影响因素 OR U=出生结局)

### Wanfang Data

题名或关键词:(早产) \*题名或关键词:(流行+影响因素+发生率+出生结局)

## eText2. List of included studies (n=162)

1. Hu CX, Li YP, Hua SP, et al. [Analysis of the related factors and neonatal outcomes of 470 cases of preterm deliveries]. *Mat Child Heal Care of China* 2013;28(18):2914-16.
2. Zhu T, Liu TJ, Ge X, et al. High prevalence of maternal vitamin D deficiency in preterm births in northeast China, Shenyang. *International journal of clinical and experimental pathology* 2015;8(2):1459-65.
3. Kong DC, Liu HY, Bu YC, et al. [The effect of chronic hepatitis B virus infection(CHB)during pregnancy on the neonatal growth and development]. *Fudan Univ J Med Sci* 2014;41(3):298-303. doi: 10.3969/j.issn.1672-8467.2014.03.003
4. Zhou SL, Liu CX, Cui H. [Changes in the risk factors for preterm delivery between 2001 and 2011]. *J China Med Univ* 2013;42(08):751-54.
5. Reyihanguli MMT, Liu HY, Han WH, et al. [Influence of intrahepatic cholestasis during pregnancy on the incidence of preterm birth]. *Chin J Epidemiol* 2017;38(10):1415-18.
6. Guo YW, Mao SF, Zhu YJ, et al. [The analysis of the occurrence and influence factors of premature]. *Chin J Coal Indust Med* 2017;20(10):1240-46.
7. Yang YX. [Clinical analysis of maternal-fetal outcome and infection caused by premature rupture of membranes] [dissertation]. Shanxi (CN): Shanxi Medical University, 2016.
8. Li YH. [Cause analysis of iatrogenic preterm birth in recent 5 years]. *J Math Med* 2016;29(03):391-93.
9. Lei Q, Niu J, Lv L, et al. Clustering of metabolic risk factors and adverse pregnancy outcomes: a prospective cohort study. *Diabetes/Metabolism Research and Reviews* 2016;32(8):835-42. doi: 10.1002/dmrr.2803
10. Liu WY, Yu ZB, Qiu HY, et al. Association between ambient air pollutants and preterm birth in Ningbo, China: A time-series study. *BMC Pediatrics* 2018;18(1) doi: 10.1186/s12887-018-1282-9
11. Guo Y, Long X, Yao S. [Correlation between the myometrial thickness in the second trimester and preterm delivery in a prospective study]. *Chin J Obstet Gynecol* 2015;50(2):108-11.
12. Lei Q, Niu JM, Duan DM, et al. [Analysis of maternal influencing factors of adverse outcomes in perinatal infants]. *Guangdong Med J* 2014;35(13):2041-45.
13. Zhu H, Yang M-J. Maternal plasma concentrations of macrophage migration inhibitory factor at first trimester as a predictive biomarker of preterm delivery in Chinese women. *Clinica Chimica Acta* 2018;483:286-90. doi: 10.1016/j.cca.2018.04.029
14. Zhang Y, Gu N, Wang Z, et al. Use of the 10-Group Classification System to analyze how the population control policy change in China has affected cesarean delivery. *International Journal of Gynecology and Obstetrics* 2017;138(2):158-63. doi: 10.1002/ijgo.12210
15. Zhang JJ. [Study on the influencing factors of preterm birth and low birth weight] [dissertation]. Gansu (CN): Lanzhou University, 2013.
16. Huang HF, Zhong WH, Zhou QN, et al. [Analysis of the occurrence of premature infants hospitalized in the hospital in

- 2014 and 2016]. *Chin J Rural Med Pharm* 2018;25(13):49.
17. Xiong JJ. [Effect of hepatitis B virus infection with abnormal liver function on preterm delivery in pregnant women]. *Mod Diagn Treat* 2017;28(11):2068-69.
  18. Qin J, Sheng X, Wu D, et al. Adverse obstetric outcomes associated with in vitro fertilization in singleton pregnancies. *Reproductive sciences (Thousand Oaks, Calif)* 2017;24(4):595-608. doi: 10.1177/1933719116667229
  19. Zhao Q-M, Liu F, Wu L, et al. Prevalence of congenital heart disease at live birth in China. *Journal of Pediatrics* 2019;204:53-58. doi: 10.1016/j.jpeds.2018.08.040
  20. Zhu L, Zhang R, Zhang S, et al. [Chinese neonatal birth weight curve for different gestational age]. *Chin J Pediatr* 2015;53(2):97-103.
  21. Wang RH, Zhang L, Wang LN, et al. [Adverse pregnancy outcomes and ambient air pollution in two urban areas of Gansu province]. *Chin J Public Health* 2018;34(01):75-78.
  22. Yan Y, Liu Z, Liu D. Heterogeneity of glycometabolism in patients with gestational diabetes mellitus: Retrospective study of 1,683 pregnant women. *Journal of Diabetes Investigation* 2017;8(4):554-59. doi: 10.1111/jdi.12595
  23. Fan LC. [Study on the association between air pollutants exposure and adverse pregnancy outcomes in Hainan province] [dissertation]. Hubei (CN): Huazhong University of Science and Technology, 2013.
  24. Ji DY, Wang J. [Relationship between birth order of live neonates and premature and low birth weight: A cross-sectional study due to the two-child policy]. *Anhui Med J* 2015;36(6):704-07.
  25. Liu L. [Periodontal status of 702 pregnant women and relationship between maternal periodontitis with preterm birth and low birth weight] [dissertation]. Anhui (CN): Anhui Medical University, 2012.
  26. Xu H, Dai Q, Xu Y, et al. Time trends and risk factor associated with premature birth and infants deaths due to prematurity in Hubei Province, China from 2001 to 2012. *BMC Pregnancy and Childbirth* 2015;15(1) doi: 10.1186/s12884-015-0767-x
  27. Hou XJ, Wu LP, Zhang RR, et al. [Relationship between multi-vitamins supplementation during the second and third trimester and risk of preterm delivery]. *Chin J Woman Child Heal Res* 2018;29(04):481-84.
  28. Peng TT. [Classification tree model for risk factors of preterm birth and interaction analysis] [dissertation]. Shanxi (CN): Shanxi Medical University, 2015.
  29. Zhao XL, Liao Y, Li LM, et al. [Retrospective cohort study on rapid body mass index gain in infants from birth to 1 year old]. *Chin J Child Heal Care* 2018;26(03):258-61.
  30. Zhang XB, Li XY, Huang Y, et al. [Clinical analysis of 1100 cases in premature labor]. *Chin J Birth Heal & Hered* 2015;23(07):52-53+120.
  31. Yu YH, Huang QT, Xu JZ, et al. [Investigation of preterm birth and preterm infants in Guangzhou regional district]. *China Mod Med* 2012;19(22):13-15+18.
  32. Liu X, Lv L, Zhang H, et al. Folic acid supplementation, dietary folate intake and risk of preterm birth in China. *European Journal of Nutrition* 2016;55(4):1411-22. doi: 10.1007/s00394-015-0959-1
  33. Xu F, Kong X, Duan S, et al. Respiratory distress syndrome in premature infants: A retrospective cohort study from 14

- hospitals in China. *International Journal of Clinical and Experimental Medicine* 2019;12(6):7497-506.
34. Liu XY, Xu LF, Jin ZB, et al. [Incidence of late preterm infants and clinical problem analysis during perinatal period]. *China Mod Med* 2014;21(26):22-23+26.
  35. Zhu Y. [A prospective multicenter epidemiology investigation of premature newborn] [dissertation]. Shanghai (CN): Fudan University, 2012.
  36. Zhang XS, Zhao GL, Yang HX, et al. [Analysis of incidence and risk factors of preterm birth in 15 urban hospitals in China]. *Chin J Perinat Med* 2016;19(6):456-61.
  37. Zhou M. [Influence factors of body mass index before pregnancy and the relationship with gestational weight gain,maternal and infants complications]. *Chin J Perinat Med* 2015;18(5):352-58.
  38. Multicenter Collaborative Team for the Respiratory Distress Syndrome. [Respiratory distress syndrome in inborn preterm neonates: A retrospective investigation in 13 hospitals in China]. *Chin J Perinat Med* 2016;19(10):743-54.
  39. Han Y, Jiang P, Dong T, et al. Maternal air pollution exposure and preterm birth in Wuxi, China: Effect modification by maternal age. *Ecotoxicology and Environmental Safety* 2018;157:457-62. doi: 10.1016/j.ecoenv.2018.04.002
  40. Chen C, Zhang JW, Xia HW, et al. Preterm birth in China between 2015 and 2016. *Am J Public Health* 2019;109(11):1597-604.
  41. Sun P-F, Ding G-C, Zhang M-Y, et al. Prevalence of congenital heart disease among infants from 2012 to 2014 in Langfang, China. *Chinese Medical Journal* 2017;130(9):1069-73. doi: 10.4103/0366-6999.204923
  42. Jiang F, Gao JS, Zhong YF, et al. [Preterm births in peking union medical college hospital in the past 25 years]. *Acta Academiae Medicinae Sinicae* 2016;38(5):528-33. doi: 10.3881/j.issn.1000-503X.2016.05.006
  43. Zhou X, Yin Y, Zhang GY, et al. [Clinical analysis of 1 466 cases of preterm birth from 2008 to 2012]. *J Int Obstet Gynecol* 2014;41(04):434-37.
  44. Liu XJ, Lu LJ, Qiu H, et al. [Epidemiological analysis of complications in preterm infants]. *Chin J Prim Med Pharm* 2019;26(3):315-18.
  45. Li PC, Liao ZJ, Wang C, et al. [Maternal characteristics and birth outcomes under different family planning policy]. *Chin J Reprod Heal* 2017;28(6):501-05.
  46. Yu H, Jiang X, Bao W, et al. Association of intimate partner violence during pregnancy, prenatal depression, and adverse birth outcomes in Wuhan, China. *Bmc Pregnancy and Childbirth* 2018;18 doi: 10.1186/s12884-018-2113-6
  47. Tian Q, Wu BQ, Liu XH, et al. [Epidemiologic study of neonatal respiratory distress syndrome in Shenzhen area]. *Chin J Appl Clin Pediatr* 2013;28(14):1083-85.
  48. Zhong SL, Deng YQ. [Clinical analysis on the changes of high risk factors related to premature delivery in the hospital from 2005 to 2014]. *J Qiqihar Univ Med* 2016;37(02):235-37.
  49. Ke L, Lin W, Liu Y, et al. Association of induced abortion with preterm birth risk in first-time mothers. *Scientific reports* 2018;8(1):5353. doi: 10.1038/s41598-018-23695-7
  50. Liu WL, Yao L, Cao SH, et al. [Influencing factors of preterm birth under regional differences]. *Contemp Med*

2016;22(1):3-5.

51. Shen CR. [Analysis of the influence of hypertensive diseases in pregnancy on birth outcome and related factors]. *Chin J Hypertens* 2015;23(2):169-70.
52. Barros FC, Papageorghiou AT, Victora CG, et al. The distribution of clinical phenotypes of preterm birth syndrome implications for prevention. *JAMA Pediatrics* 2015;169(3):220-29. doi: 10.1001/jamapediatrics.2014.3040
53. Zhao QQ. [Clinical analysis of 930 cases of preterm birth] [dissertation]. Liaoning (CN): Dalian Medical University, 2016.
54. Zhou J, Su L, Liu M, et al. Associations between 25-hydroxyvitamin D levels and pregnancy outcomes: A prospective observational study in southern China. *European Journal of Clinical Nutrition* 2014;68(8):925-30. doi: 10.1038/ejcn.2014.99
55. Dong RJ. [The differences occurred of premature delivery in Korean and Han nationalities and relationship between IL-6, TNF- $\alpha$  in umbilical cord blood of neonates with PPRM and chorioamnionitis] [dissertation]. Jilin (CN): Yanbian University, 2017.
56. Feng FF, Lei T, Wu Q. [Risk factors of preterm birth and its influence on the fetus]. *Med Inform* 2013;26(8):138-38.
57. Zhuang X, Cui AM, Wang Q, et al. Liver dysfunction during pregnancy and its association of with preterm birth in China: A prospective cohort study. *EBioMedicine* 2017;26:152-56. doi: 10.1016/j.ebiom.2017.11.014
58. Liu Y, Li G, Zhang W. Effect of fetal gender on pregnancy outcomes in Northern China. *Journal of Maternal-Fetal & Neonatal Medicine* 2017;30(7):858-63. doi: 10.1080/14767058.2016.1189527
59. Sun JH. [Prospective study of obstetrics and gynecology on the relationship between artificial abortion and premature delivery]. *Guide China Med* 2013;11(26):12-13.
60. Yan JM, Huang H, Li QQ, et al. [A single-center study on the incidence and mortality of preterm infants from 2006 to 2016]. *Chin J Contemp Pediatr* 2018;20(5):368-72.
61. Zeng LX. [Investigation and analysis on the prevalence and outcome of premature infants after the implementation of the two-child policy]. *J Xiangnan Univ (Med Sci)* 2017;19(4):53-55.
62. Tan J, Huang S, He G, et al. Maternal hepatitis B surface antigen carrier status and its impact on neonatal outcomes: A cohort study of 21 947 singleton newborns in China. *Journal of Maternal-Fetal & Neonatal Medicine* 2017;30(18):2219-24. doi: 10.1080/14767058.2016.1243098
63. Guo TJ, Zhang Y, Wang YY, et al. [Influence of extreme ambient temperature exposure on preterm birth]. *Chin J Woman Child Heal Res* 2017;28(12):1521-24.
64. Chen P. [Statistical analysis of the correlation between pre-pregnancy body mass index and weight gain during pregnancy and preterm birth]. *Chin J Hos Stat* 2015;22(02):116-17.
65. Liu L, Hong Z, Zhang L. Associations of prepregnancy body mass index and gestational weight gain with pregnancy outcomes in nulliparous women delivering single live babies. *Scientific reports* 2015;5:12863. doi: 10.1038/srep12863
66. Huang X, Tan H, Cai M, et al. Gestational weight gain in Chinese women - results from a retrospective cohort in Changsha, China. *Bmc Pregnancy and Childbirth* 2018;18 doi: 10.1186/s12884-018-1833-y

67. Tang W, Mu Y, Li X, et al. Low birthweight in China: Evidence from 441 health facilities between 2012 and 2014. *Journal of Maternal-Fetal and Neonatal Medicine* 2017;30(16):1997-2002. doi: 10.1080/14767058.2016.1236081
68. Xu R, Wang J, Liu JN, et al. [The trend and risk factors of preterm birth and low birth weight in Suzhou]. *Mat Child Heal Care of China* 2016;31(22):4793-96.
69. Lu RX. [Investigation of preterm status quo and prognosis of preterm of Fuyang City]. *China Mod Doctor* 2012;50(33):21-23.
70. Wang XJ, Wen XL, Xie WH. [An epidemiological survey of premature infants in Guangzhou Women and Children Medical Center]. *Shenzhen J Integ Trad Chin West Med* 2018;28(11):16-17.
71. Wang S, Wang T, Zhang W, et al. Cohort study on maternal cytomegalovirus seroprevalence and prevalence and clinical manifestations of congenital infection in China. *Medicine* 2017;96(5) doi: 10.1097/md.0000000000006007
72. Yi L, Zhang B, Han Q, et al. [Study on the neonatal conditions in four cities of China in 2012]. *Journal of Clinical Pediatrics* 2013;31(10):917-20.
73. Du HJ, Zhao ZY, Ci LJ, et al. [A survey of newborns in the hospital in 2013]. *Chin J of Clinical Rational Drug Use* 2016;9(02):138-40.
74. Guo T, Wang Y, Zhang H, et al. The association between ambient temperature and the risk of preterm birth in China. *Science of the Total Environment* 2018;613:439-46. doi: 10.1016/j.scitotenv.2017.09.104
75. Ding J, Zhang JX. [Analysis on the influencing factors of premature delivery in Beijing Hui Min Hospital]. *Chin Baby* 2016(4):7-8.
76. Luo XL, Zhang WY. Obstetrical disease spectrum in China: An epidemiological study of 111,767 cases in 2011. *Chinese Medical Journal* 2015;128(9):1137-46. doi: 10.4103/0366-6999.156076
77. Liu YW. [Study on the effects of blood pressure changes before and after pregnancy on pregnancy outcome] [dissertation]. Hebei (CN): North China University of Science and Technology, 2018.
78. Kang HX, Ma CH, Wei Y, et al. [Analysis of the relationship between the risk of preterm delivery in singleton pregnancy and in vitro fertilization and embryo transfer]. *Chin J Prac Gynecol Obstet* 2017;33(06):609-12.
79. Yuan X, Hu H, Zhang M, et al. Iron deficiency in late pregnancy and its associations with birth outcomes in Chinese pregnant women: A retrospective cohort study. *Nutrition & Metabolism* 2019;16 doi: 10.1186/s12986-019-0360-9
80. Xue Q, Shen F, Gao Y, et al. An analysis of the medical indications for preterm birth in an obstetrics and gynaecology teaching hospital in Shanghai, China. *Midwifery* 2016;35:17-21. doi: 10.1016/j.midw.2016.01.013
81. Liu JL. [Effect of early perinatal care on preterm birth prevention and preterm birth prevalence reduction]. *Chin Fore Women Heal* 2013(02X):103-04.
82. Xu Q, Yang Y, Wang L, et al. Preconception alanine aminotransferase concentrations and risk of preterm birth in rural Chinese women aged 20-49 years: A population-based cohort study. *Lancet* 2018;392:13-13.
83. Ren DF. [Epidemiology investigation of relevant factors of preterm labour] [dissertation]. Jiangsu (CN): Southeast University, 2013.

84. Shan X, Chen F, Wang W, et al. Secular trends of low birthweight and macrosomia and related maternal factors in Beijing, China: A longitudinal trend analysis. *BMC Pregnancy and Childbirth* 2014;14(1) doi: 10.1186/1471-2393-14-105
85. Yu HT, Jin WZ, Qian NS, et al. [Evaluating newborn's adverse birth outcomes attributable to maternal secondhand smoke exposure in Shanghai]. *J Environ Occup Med* 2016;33(10):954-58.
86. Yan H, Gao S, Li N, et al. Impact of cervical length on preterm birth in northern China: A prospective cohort study. *Journal of Maternal-Fetal and Neonatal Medicine* 2019 doi: 10.1080/14767058.2019.1570116
87. Wang CS, Wei YM, Yang HX. [Analysis of the effects of gestational diabetes mellitus based on abnormal blood glucose on pregnancy outcomes]. *Chin J Obstet Gynecol* 2013;48(12):899-902.
88. Li SS. [A study on the relationship between anxiety, stress and its relationship with preterm delivery] [dissertation]. Guangxi (CN): Guangxi Medical University, 2017.
89. Xin QQ, Chen BW, Yin DL, et al. Prevalence of anemia and its risk factors among children under 36 months old in China. *Journal of Tropical Pediatrics* 2017;63(1):36-42. doi: 10.1093/tropej/fmw049
90. Guan T, Xue T, Gao S, et al. Acute and chronic effects of ambient fine particulate matter on preterm births in Beijing, China: A time-series model. *Science of the Total Environment* 2019;650:1671-77. doi: 10.1016/j.scitotenv.2018.09.279
91. Guo Y, Liu Y, He J-R, et al. Changes in birth weight between 2002 and 2012 in Guangzhou, China. *PLoS one* 2014;9(12) doi: 10.1371/journal.pone.0115703
92. Ye L, Ji Y, Lv W, et al. Associations between maternal exposure to air pollution and birth outcomes: A retrospective cohort study in Taizhou, China. *Environmental science and pollution research international* 2018;25(22):21927-36. doi: 10.1007/s11356-018-1944-z
93. Han S, Yang X, Zhou Y, et al. Deafness gene mutations in newborns in Beijing. *Acta oto-laryngologica* 2016;136(5):475-9. doi: 10.3109/00016489.2015.1128121
94. Li C, Liang Z, Bloom MS, et al. Temporal trends of preterm birth in Shenzhen, China: A retrospective study. *Reproductive Health* 2018;15(1) doi: 10.1186/s12978-018-0477-8
95. Yang M, Wang Y, Chen Y, et al. Impact of maternal HIV infection on pregnancy outcomes in southwestern China - a hospital registry based study. *Epidemiology and infection* 2019;147:e124. doi: 10.1017/S0950268818003345
96. Zhang DD, Tan DX, Wang B, et al. [Association between gestational weight gain and preterm birth: A retrospective epidemiological analysis in Wuhan]. *Chin J Epidemiol* 2016;37(7):1012-16.
97. Yu R, Wang FY, Cui ZQ, et al. [Comparative analysis of correlative factors in different types premature delivery]. *Chin J Diffic and Compl Cas* 2015;14(5):501-03.
98. Zhao JQ, Yang N, Gong LF, et al. [Analysis on newborn status of preterm infants in Beijing from 2011 to 2016]. *Chin J Child Heal Care* 2018;26(11):1254-56.
99. Su WJ, Chen YL, Huang PY, et al. Effects of prepregnancy body mass index, weight gain, and gestational diabetes mellitus on pregnancy outcomes: A population-based study in Xiamen, China, 2011-2018. *Annals of nutrition & metabolism* 2019;75(1):31-38. doi: 10.1159/000501710



100. Zheng F. [Risk factor analysis of premature delivery in pregnant women and its influence on neonates]. *Heal Mus Read Mag* 2013(10):500-01.
101. Xia M, Yang P, Cui W, et al. Clinical analysis of 122 Chinese cases of twin pregnancy complicated with preterm birth and outcomes of preterm infants. *International Journal of Clinical and Experimental Medicine* 2017;10(7):10857-65.
102. Xu J, Wang J, Xuan S, et al. The effects of childbirth age on maternal and infant outcomes in pregnant women. *Iranian journal of public health* 2018;47(6):788-93.
103. Wang C, Wang XY, Yang HX. [Effect of maternal age on pregnancy outcomes in Beijing]. *Chin J Obstet Gynecol* 2017;52(8):514-20.
104. Li X, Liu Y, Liu F, et al. Analysis of short-term and sub-chronic effects of ambient air pollution on preterm birth in central China. *Environmental Science and Pollution Research* 2018;25(19):19028-39. doi: 10.1007/s11356-018-2061-8
105. Wei LJ, Liu S, Huang DP, et al. [Dose-response relationship between maternal hemoglobin concentration and preterm birth, in pregnant women]. *Chin J Epidemiol* 2019;40(4):471-74.
106. Ye J. [Hypertension disorder in pregnancy: Prediction and risk for adverse pregnancy outcomes] [dissertation]. Guangxi (CN): Guangxi Medical University, 2017.
107. Xu HR. [Clinical study of early perinatal health care to prevent premature delivery and reduce the prevalence of premature delivery]. *Chin J Heal Care Nutri* 2013;1(1):119-19.
108. Lin XH, Wu DD, Li C, et al. Maternal high triglyceride levels during early pregnancy and risk of preterm delivery: A retrospective cohort study. *Journal of Clinical Endocrinology and Metabolism* 2019;104(4):1249-58. doi: 10.1210/jc.2018-01372
109. Hu R, Chen Y, Zhang Y, et al. Association between vomiting in the first trimester and preterm birth: A retrospective birth cohort study in Wuhan, China. *Bmj Open* 2017;7(9) doi: 10.1136/bmjopen-2017-017309
110. Sun B, Wang D. [Impact of perinatal risks and social, cultural and technological factors on outcome of preterm neonates]. Proceedings of the 5th Shanghai Neonatal Forum. 2015 Apr 9-11; Shanghai, China:2015. p. 57-59.
111. Guo P, Miao H, Chen Y, et al. Maternal exposure to gaseous ambient air pollutants increases the risk of preterm birth in the Pearl River Delta, China 2014-2017. *Science of the Total Environment* 2019;671:959-70. doi: 10.1016/j.scitotenv.2019.03.375
112. Liu T, Qiu XQ, Zeng XY, et al. [Influencing factors of premature delivery of pregnant women in Guangxi region and the relationship between premature birth and basic characteristics of perinatal infant]. *Mat Child Heal Care of China* 2019;34(11):2596-601.
113. He JR, Ramakrishnan R, Lai YM, et al. Predictions of preterm birth from early pregnancy characteristics: Born in Guangzhou cohort study. *Journal of clinical medicine* 2018;7(8):185. doi: 10.3390/jcm7080185
114. Yang W, Han F, Gao X, et al. Relationship between gestational weight gain and pregnancy complications or delivery outcome. *Scientific reports* 2017;7(1):12531. doi: 10.1038/s41598-017-12921-3
115. Liu S, Yan Y, Gao X, et al. Risk factors for postpartum depression among Chinese women: Path model analysis. *BMC*

116. Xiao Y, Sun H, Li C, et al. Effect of iodine nutrition on pregnancy outcomes in an iodine-sufficient area in China. *Biological Trace Element Research* 2018;182(2):231-37. doi: 10.1007/s12011-017-1101-4
117. li GJ. [Analysis of risk factors of 202 premature births]. *Guide China Med* 2013;11(31):162-64.
118. Dai XW, Li XX. [Study on the relationship between depression during pregnancy and premature delivery]. *Mat Child Heal Care of China* 2019;34(4):792-96.
119. Wang C, Lin L, Su R, et al. Hemoglobin levels during the first trimester of pregnancy are associated with the risk of gestational diabetes mellitus, pre-eclampsia and preterm birth in Chinese women: A retrospective study. *Bmc Pregnancy and Childbirth* 2018;18 doi: 10.1186/s12884-018-1800-7
120. Tang JB. [Analysis of epidemiology and related risk factors of low birth weight infants] [dissertation]. Zhejiang (CN): Ningbo University, 2018.
121. Li R, Zhang J, Zhou R, et al. Sleep disturbances during pregnancy are associated with cesarean delivery and preterm birth. *The journal of maternal-fetal & neonatal medicine: the official journal of the European Association of Perinatal Medicine, the Federation of Asia and Oceania Perinatal Societies, the International Society of Perinatal Obstetr* 2017;30(6):733-38. doi: 10.1080/14767058.2016.1183637
122. Wang YC. [An epidemiological study on the birth and growth of preterm infants in the Wenzhou area in 2014] [dissertation]. Zhejiang (CN): Wenzhou Medical University, 2018.
123. Pan L, Leng J, Liu G, et al. Pregnancy outcomes of Chinese women with gestational diabetes mellitus defined by the IADPSG's but not by the 1999 WHO's criteria. *Clinical Endocrinology* 2015;83(5):684-93. doi: 10.1111/cen.12801
124. Hu J, Li Y, Zhang B, et al. Impact of the 2017 ACC/AHA Guideline for high blood pressure on evaluating gestational hypertension-associated risks for newborns and mothers. *Circulation research* 2019;125(2):184-94. doi: 10.1161/circresaha.119.314682
125. Xiao Q, Chen H, Strickland MJ, et al. Associations between birth outcomes and maternal PM2.5 exposure in Shanghai: A comparison of three exposure assessment approaches. *Environment international* 2018;117:226-36. doi: 10.1016/j.envint.2018.04.050
126. He JF, Xiong HY, Li L. [Clinical features of premature birth: A report of 599 cases from a hospital]. *J Third Mil Med Univ* 2014;36(9):966-70.
127. Xue XP, Su B. [Analysis on the influencing factors for preterm birth, Taiyuan, 2009-2010]. *Prev Med Trib* 2015;21(6):408-11.
128. Xu X, Tan HZ, Zhou SJ, et al. [Study on the application of Back-Propagation Artificial Neural Network used the model in predicting preterm birth]. *Chin J Epidemiol* 2014;35(9):1028-31.
129. Yang Q, Zhou ZX, Wang F, et al. [Discussion on the related factors and preventive measures of premature delivery]. *Mat Child Heal Care of China* 2012;27(15):2305-06+72.
130. Long XZ. [Fetal fibronectin quantitative clinical observations and research]. *M M I* 2016;25(03):600-03.

131. Guo YW, Tan HZ, Zhou SJ, et al. [A population based study on incidence and determinants of preterm birth in Liuyang Hunan]. *J Cent South Univ (Med Sci)* 2013;38(4):413-18.
132. Zhang CH, Liu XY, Zhan YW, et al. Effects of prepregnancy body mass index and gestational weight gain on pregnancy outcomes. *Asia-Pacific journal of public health* 2015;27(6):620-30. doi: 10.1177/1010539515589810
133. Zhu B, Huang K, Bao W, et al. Dose-response relationship between maternal blood pressure in pregnancy and risk of adverse birth outcomes: Ma'anshan birth cohort study. *Pregnancy hypertension* 2019;15:16-22. doi: 10.1016/j.preghy.2018.09.004
134. Ding HY, Xiamusiye MYDL, Li MC, et al. [Analysis of trends of birth weight, and incidence of adverse birth outcomes and relevant factors from 2002 to 2015]. *Chin J Dis Control Prev* 2018;22(4):380-85.
135. Wang F, Zhang HL. [The prevalence and risk factors of preterm birth in Ezhou city from 2010 to 2014]. *Chin J Social Med* 2016;33(3):252-54,55. doi: 10.3969/j.issn.1673-5625.2016.03.017
136. Ma HH, Jin CY, Wang HJ, et al. [Prevalence and risk factors of preterm birth among singletons from 2013 to 2017 in Tongzhou district of Beijing]. *Chin J Child Heal Care* 2019;27(06):592-96.
137. Zhou M, Zhang T, Huang AQ, et al. [Relationship between normative antenatal care and preterm birth]. *Chin J Woman Child Heal Res* 2015;26(3):422-25.
138. Tian JR, Tang WJ, Su C, et al. [Study of risk factors of preterm delivery in Qinzhou, Guangxi]. *Applied Prev Med* 2018;24(03):173-77.
139. Zhao YJ. [The changing trends of birth outcomes in Taicang, Jiangsu from 2009 to 2015 and their risk factor analysis] [dissertation]. Beijing (CN): Chinese Center for Disease Control and Prevention, 2017.
140. Wang H, Yue H, Sun B, et al. Birth population survey in Huai'an in 2015: Perinatal-neonatal mortality and preterm birth rate in emerging regions in China. *Journal of Maternal-Fetal and Neonatal Medicine* 2018 doi: 10.1080/14767058.2018.1506439
141. Hu CY, Li FL, Jiang W, et al. Pre-pregnancy health status and risk of preterm birth: A large, Chinese, rural, population-based study. *Medical Science Monitor* 2018;24:4718-27. doi: 10.12659/MSM.908548
142. Zheng W, Huang W, Zhang L, et al. Changes in Serum Lipid Levels During Pregnancy and Association With Neonatal Outcomes: A Large Cohort Study. *Reproductive Sciences* 2018;25(9):1406-12. doi: 10.1177/1933719117746785
143. Huang A, Wu K, Zhao W, et al. Attendance at prenatal care and adverse birth outcomes in China: A followup study based on Maternal and Newborn's Health Monitoring System. *Midwifery* 2018;57:26-31. doi: 10.1016/j.midw.2017.10.018
144. Fei L. [The prevalence of preterm birth and its influencing factors in Gongyi]. *Mat Child Heal Care of China* 2014;29(14):2152-53.
145. Fang HQ, Xu H. [Occurrence of low birth weight infants and its influencing factors in Yandu district of Yancheng in 2015]. *Chin Nurs Res* 2017;31(1):359-61.
146. Yang J, Liu Y, Liu H, et al. Associations of maternal iodine status and thyroid function with adverse pregnancy outcomes in Henan Province of China. *Journal of Trace Elements in Medicine and Biology* 2018;47:104-10. doi:

147. Wen T, Lv Y. Inadequate gestational weight gain and adverse pregnancy outcomes among normal weight women in China. *International Journal of Clinical and Experimental Medicine* 2015;8(2):2881-86.
148. Jia XM. [Maternal psychosocial stress in the first trimester of pregnancy and premature birth: A follow up study] [dissertation]. Anhui (CN): Anhui Medical University, 2015.
149. Chen LM, Du WJ, Dai J, et al. Effects of subclinical hypothyroidism on maternal and perinatal outcomes during pregnancy: A single-center cohort study of a Chinese population. *PloS one* 2014;9(10):e109364. doi: 10.1371/journal.pone.0109364
150. Fan XJ, Gao JM, Kang YJ, et al. Socioeconomic and environmental determinants to preterm birth in Tibetan women: An analysis based on the hierarchically conceptual frame. *Chinese medical journal* 2017;130(19):2307-15. doi: 10.4103/0366-6999.215341
151. Fang J, Liu H, Zhao H, et al. Association of in utero hexachlorocyclohexane exposure with gestational age. *Ecotoxicology and environmental safety* 2019;174:263-69. doi: 10.1016/j.ecoenv.2019.02.089
152. Li Y, Chen X, Chen S, et al. [A cohort study on the impacts of pre-pregnancy maternal body mass index, gestational weight gain on neonate birth status and perinatal outcomes in Fujian province]. *Chin J Epidemiol* 2014;35(6):635-40.
153. Li MM, Li C, Zhang BY, et al. [Relationship between preterm birth of infant and medication during pregnancy in women of childbearing age in Shaanxi]. *Chin J Epidemiol* 2019;40(5):554-58.
154. Hu Y, Li L, Huang WZ, et al. [Retrospective study of risk factors for premature birth in our hospital in recent 10 years]. *Hainan Med J* 2016;27(20):3356-58.
155. Jin WY, Lin SL, Hou RL, et al. Associations between maternal lipid profile and pregnancy complications and perinatal outcomes: A population-based study from China. *BMC pregnancy and childbirth* 2016;16:60. doi: 10.1186/s12884-016-0852-9
156. Zhao X. [A study on the correlation between the different levels of weight gain in pregnancy and the effect of pregnancy outcome] [dissertation]. Shandong (CN): Qingdao University, 2018.
157. Guo T, Wang Y, Zhang Y, et al. Association between PM2.5 exposure and the risk of preterm birth in Henan, China: A retrospective cohort study. *The Lancet* 2017;390(SPEC.ISS 1):24.
158. Guo YW, Mao SF. [The retrospective of preterm birth outcomes and macrosomia pregnancy in hospital of Chengde in 2010]. *Hebei Med* 2016;22(10):1752-54.
159. Wang J. [Analysis of relationship between premature rupture of membranes and maternal and fetal complications]. *J China Prescri Drug* 2014;12(02):60-61.
160. Jiang Y. [Analysis of relevant risk factors for premature delivery of 5000 pregnant women in Guzhen area of Zhongshan city in Guangdong province]. *China Mod Med* 2016;23(01):137-40.
161. Wang M, Zhang FX, Li M. [Study on the relationship between prevention and treatment of gingivitis during pregnancy and the prevention of premature delivery and low birth weight infants]. *Ningxia Med J* 2013;35(12):1238-39.

162. Wang FX, Ding YH, Xu L. [Analysis of eugenics health examination results of pre pregnancy in Zhejiang province]. *Prev Med* 2019;31(07):742-43+47.

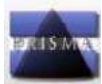

# PRISMA 2020 Checklist

| Section and Topic             | Item # | Checklist item                                                                                                                                                                                                                                                                                       | Location where item is reported |
|-------------------------------|--------|------------------------------------------------------------------------------------------------------------------------------------------------------------------------------------------------------------------------------------------------------------------------------------------------------|---------------------------------|
| <b>TITLE</b>                  |        |                                                                                                                                                                                                                                                                                                      |                                 |
| Title                         | 1      | Identify the report as a systematic review.                                                                                                                                                                                                                                                          | P1                              |
| <b>ABSTRACT</b>               |        |                                                                                                                                                                                                                                                                                                      |                                 |
| Abstract                      | 2      | See the PRISMA 2020 for Abstracts checklist.                                                                                                                                                                                                                                                         | P1                              |
| <b>INTRODUCTION</b>           |        |                                                                                                                                                                                                                                                                                                      |                                 |
| Rationale                     | 3      | Describe the rationale for the review in the context of existing knowledge.                                                                                                                                                                                                                          | P1-P2                           |
| Objectives                    | 4      | Provide an explicit statement of the objective(s) or question(s) the review addresses.                                                                                                                                                                                                               | P2                              |
| <b>METHODS</b>                |        |                                                                                                                                                                                                                                                                                                      |                                 |
| Eligibility criteria          | 5      | Specify the inclusion and exclusion criteria for the review and how studies were grouped for the syntheses.                                                                                                                                                                                          | P2                              |
| Information sources           | 6      | Specify all databases, registers, websites, organisations, reference lists and other sources searched or consulted to identify studies. Specify the date when each source was last searched or consulted.                                                                                            | P2                              |
| Search strategy               | 7      | Present the full search strategies for all databases, registers and websites, including any filters and limits used.                                                                                                                                                                                 | eText1                          |
| Selection process             | 8      | Specify the methods used to decide whether a study met the inclusion criteria of the review, including how many reviewers screened each record and each report retrieved, whether they worked independently, and if applicable, details of automation tools used in the process.                     | P2                              |
| Data collection process       | 9      | Specify the methods used to collect data from reports, including how many reviewers collected data from each report, whether they worked independently, any processes for obtaining or confirming data from study investigators, and if applicable, details of automation tools used in the process. | P2-P3                           |
| Data items                    | 10a    | List and define all outcomes for which data were sought. Specify whether all results that were compatible with each outcome domain in each study were sought (e.g. for all measures, time points, analyses), and if not, the methods used to decide which results to collect.                        | P2-P3                           |
|                               | 10b    | List and define all other variables for which data were sought (e.g. participant and intervention characteristics, funding sources). Describe any assumptions made about any missing or unclear information.                                                                                         | P2-P3                           |
| Study risk of bias assessment | 11     | Specify the methods used to assess risk of bias in the included studies, including details of the tool(s) used, how many reviewers assessed each study and whether they worked independently, and if applicable, details of automation tools used in the process.                                    | P3                              |
| Effect measures               | 12     | Specify for each outcome the effect measure(s) (e.g. risk ratio, mean difference) used in the synthesis or presentation of results.                                                                                                                                                                  | P3                              |
| Synthesis methods             | 13a    | Describe the processes used to decide which studies were eligible for each synthesis (e.g. tabulating the study intervention characteristics and comparing against the planned groups for each synthesis (item #5)).                                                                                 | P3                              |
|                               | 13b    | Describe any methods required to prepare the data for presentation or synthesis, such as handling of missing summary statistics, or data conversions.                                                                                                                                                | P3                              |
|                               | 13c    | Describe any methods used to tabulate or visually display results of individual studies and syntheses.                                                                                                                                                                                               | P3                              |
|                               | 13d    | Describe any methods used to synthesize results and provide a rationale for the choice(s). If meta-analysis was performed, describe the model(s), method(s) to identify the presence and extent of statistical heterogeneity, and software package(s) used.                                          | P3                              |
|                               | 13e    | Describe any methods used to explore possible causes of heterogeneity among study results (e.g. subgroup analysis, meta-regression).                                                                                                                                                                 | P3                              |
|                               | 13f    | Describe any sensitivity analyses conducted to assess robustness of the synthesized results.                                                                                                                                                                                                         | P3                              |
| Reporting bias assessment     | 14     | Describe any methods used to assess risk of bias due to missing results in a synthesis (arising from reporting biases).                                                                                                                                                                              | P3                              |

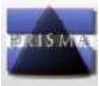

## PRISMA 2020 Checklist

| Section and Topic                              | Item # | Checklist item                                                                                                                                                                                                                                                                       | Location where item is reported |
|------------------------------------------------|--------|--------------------------------------------------------------------------------------------------------------------------------------------------------------------------------------------------------------------------------------------------------------------------------------|---------------------------------|
| Certainty assessment                           | 15     | Describe any methods used to assess certainty (or confidence) in the body of evidence for an outcome.                                                                                                                                                                                | P3                              |
| <b>RESULTS</b>                                 |        |                                                                                                                                                                                                                                                                                      |                                 |
| Study selection                                | 16a    | Describe the results of the search and selection process, from the number of records identified in the search to the number of studies included in the review, ideally using a flow diagram.                                                                                         | P3, Fig1                        |
|                                                | 16b    | Cite studies that might appear to meet the inclusion criteria, but which were excluded, and explain why they were excluded.                                                                                                                                                          | P3                              |
| Study characteristics                          | 17     | Cite each included study and present its characteristics.                                                                                                                                                                                                                            | eText2, eTable2                 |
| Risk of bias in studies                        | 18     | Present assessments of risk of bias for each included study.                                                                                                                                                                                                                         | P4, eTable3                     |
| Results of individual studies                  | 19     | For all outcomes, present, for each study: (a) summary statistics for each group (where appropriate) and (b) an effect estimate and its precision (e.g. confidence/credible interval), ideally using structured tables or plots.                                                     | eFig1, Fig3                     |
| Results of syntheses                           | 20a    | For each synthesis, briefly summarise the characteristics and risk of bias among contributing studies.                                                                                                                                                                               | P3-P4                           |
|                                                | 20b    | Present results of all statistical syntheses conducted. If meta-analysis was done, present for each the summary estimate and its precision (e.g. confidence/credible interval) and measures of statistical heterogeneity. If comparing groups, describe the direction of the effect. | P3-P5                           |
|                                                | 20c    | Present results of all investigations of possible causes of heterogeneity among study results.                                                                                                                                                                                       | P3-P5                           |
|                                                | 20d    | Present results of all sensitivity analyses conducted to assess the robustness of the synthesized results.                                                                                                                                                                           | P4                              |
| Reporting biases                               | 21     | Present assessments of risk of bias due to missing results (arising from reporting biases) for each synthesis assessed.                                                                                                                                                              | P4                              |
| Certainty of evidence                          | 22     | Present assessments of certainty (or confidence) in the body of evidence for each outcome assessed.                                                                                                                                                                                  | P3-P5                           |
| <b>DISCUSSION</b>                              |        |                                                                                                                                                                                                                                                                                      |                                 |
| Discussion                                     | 23a    | Provide a general interpretation of the results in the context of other evidence.                                                                                                                                                                                                    | P5-P6                           |
|                                                | 23b    | Discuss any limitations of the evidence included in the review.                                                                                                                                                                                                                      | P7-P8                           |
|                                                | 23c    | Discuss any limitations of the review processes used.                                                                                                                                                                                                                                | P7-P8                           |
|                                                | 23d    | Discuss implications of the results for practice, policy, and future research.                                                                                                                                                                                                       | P7                              |
| <b>OTHER INFORMATION</b>                       |        |                                                                                                                                                                                                                                                                                      |                                 |
| Registration and protocol                      | 24a    | Provide registration information for the review, including register name and registration number, or state that the review was not registered.                                                                                                                                       | P2                              |
|                                                | 24b    | Indicate where the review protocol can be accessed, or state that a protocol was not prepared.                                                                                                                                                                                       | P2                              |
|                                                | 24c    | Describe and explain any amendments to information provided at registration or in the protocol.                                                                                                                                                                                      | P2                              |
| Support                                        | 25     | Describe sources of financial or non-financial support for the review, and the role of the funders or sponsors in the review.                                                                                                                                                        | P8                              |
| Competing interests                            | 26     | Declare any competing interests of review authors.                                                                                                                                                                                                                                   | P8                              |
| Availability of data, code and other materials | 27     | Report which of the following are publicly available and where they can be found: template data collection forms; data extracted from included studies; data used for all analyses; analytic code; any other materials used in the review.                                           | P8                              |

From: Page MJ, McKenzie JE, Bossuyt PM, et al. The PRISMA 2020 statement: an updated guideline for reporting systematic reviews. *BMJ* 2021;372:n71. doi:10.1136/bmj.n71

For more information, visit: [www.prisma-statement.org](http://www.prisma-statement.org).

**eTable2. Characteristics of included studies (n=162)**

| No. | Publication year | First author         | Language | Study year | Study setting(s) | Region <sup>a</sup> | Data source <sup>b</sup> | HS level | Singleton only | Lower boundary | Upper boundary | Live birth only | Unit of analysis <sup>c</sup> | Total participants | Number of cases | Rate (%) |
|-----|------------------|----------------------|----------|------------|------------------|---------------------|--------------------------|----------|----------------|----------------|----------------|-----------------|-------------------------------|--------------------|-----------------|----------|
| 1   | 2013             | Hu Chunxia           | Chinese  | 2011       | Hainan           | E                   | HS                       | 3        | No             | 28             | 37             | No              | W                             | 1619               | 470             | 29.0     |
| 2   | 2015             | Zhu Tong             | English  | 2012       | Liaoning         | NE                  | HS                       | 3        | Yes            | 27 or less     | 37             | Yes             | N                             | 821                | 180             | 21.9     |
| 3   | 2014             | Kong Dechuan         | Chinese  | 2012       | Anhui            | C                   | HS                       | 3        | Yes            | 27 or less     | 37             | Yes             | W                             | 1028               | 219             | 21.3     |
| 4   | 2013             | Zhou Shenglan        | Chinese  | 2011       | Liaoning         | NE                  | HS                       | 3        | No             | 28             | 37             | U <sup>d</sup>  | W                             | 6063               | 1123            | 18.5     |
| 5   | 2017             | Reyihanguli Maimaiti | Chinese  | 2014       | Anhui            | C                   | HS                       | 3        | Yes            | U              | 37             | Yes             | W                             | 2758               | 449             | 16.3     |
| 6   | 2017             | Guo Yanwei           | Chinese  | 2013       | Hebei            | E                   | HS                       | 3        | Yes            | 27 or less     | 37             | Yes             | N                             | 8094               | 1285            | 15.9     |
| 7   | 2016             | Yang Yinxia          | Chinese  | 2014       | Shanxi           | C                   | HS                       | 3        | No             | U              | 37             | U               | W                             | 4903               | 754             | 15.4     |
| 8   | 2016             | Li Yanhong           | Chinese  | 2012       | Guangdong        | E                   | HS                       | 2        | No             | 28             | 37             | Yes             | W                             | 8963               | 1326            | 14.8     |
| 9   | 2016             | Lei Qiong            | English  | 2013       | Guangdong        | E                   | HS                       | 3        | Yes            | 27 or less     | 37             | Yes             | W                             | 5535               | 810             | 14.6     |
| 10  | 2018             | Liu Wenyan           | English  | 2015       | Zhejiang         | E                   | HS                       | 3        | Yes            | 27 or less     | 37             | Yes             | N                             | 37159              | 5428            | 14.6     |
| 11  | 2015             | Guo Yeqing           | Chinese  | 2012       | Hunan            | C                   | HS                       | 3        | Yes            | 28             | 37             | Yes             | W                             | 1031               | 147             | 14.3     |
| 12  | 2014             | Lei Qiong            | Chinese  | 2011       | Guangdong        | E                   | HS                       | 3        | Yes            | U              | 37             | Yes             | W                             | 5498               | 726             | 13.2     |
| 13  | 2018             | Zhu Hui              | English  | 2016       | Fujian           | E                   | HS                       | 3        | Yes            | U              | 37             | Yes             | W                             | 596                | 76              | 12.8     |
| 14  | 2017             | Zhang Yihui          | English  | 2015       | Jiangsu          | E                   | HS                       | 3        | No             | 28             | 37             | No              | W                             | 11006              | 1359            | 12.3     |
| 15  | 2013             | Zhang Jingjing       | Chinese  | 2012       | Gansu            | W                   | HS                       | U        | Yes            | 28             | 37             | Yes             | N                             | 1270               | 154             | 12.1     |
| 16  | 2018             | Huang Huafei         | Chinese  | 2015       | Zhejiang         | E                   | HS                       | 3        | No             | 28             | 37             | Yes             | N                             | 33958              | 4090            | 12.0     |
| 17  | 2017             | Xiong Jiangjun       | Chinese  | 2014       | Hunan            | C                   | HS                       | 3        | No             | U              | 37             | U               | W                             | 3190               | 378             | 11.8     |



| No. | Publication year | First author   | Language | Study year | Study setting(s)                                   | Region <sup>a</sup> | Data source <sup>b</sup> | HS level       | Singleton only | Lower boundary | Upper boundary | Live birth only | Unit of analysis <sup>c</sup> | Total participants | Number of cases | Rate (%) |
|-----|------------------|----------------|----------|------------|----------------------------------------------------|---------------------|--------------------------|----------------|----------------|----------------|----------------|-----------------|-------------------------------|--------------------|-----------------|----------|
| 18  | 2017             | Qin Jiabi      | English  | 2015       | Hunan                                              | C                   | HS                       | 3              | Yes            | U              | 37             | No              | W                             | 5639               | 661             | 11.7     |
| 19  | 2019             | Zhao Quming    | English  | 2012       | China                                              | China               | HS                       | U              | No             | U              | 37             | Yes             | N                             | 122765             | 13995           | 11.4     |
| 20  | 2015             | Zhu Li         | Chinese  | 2012       | China                                              | China               | HS                       | U              | Yes            | 27 or less     | 37             | Yes             | N                             | 159334             | 17495           | 11.0     |
| 21  | 2018             | Wang Renhong   | Chinese  | 2011       | Gansu                                              | W                   | HS                       | U              | Yes            | 28             | 37             | No              | N                             | 33804              | 3682            | 10.9     |
| 22  | 2017             | Yan Yan        | English  | 2010       | Shanghai                                           | E                   | HS                       | 3              | No             | U              | 37             | U               | W                             | 1683               | 183             | 10.9     |
| 23  | 2013             | Fan Lichun     | Chinese  | 2010       | Hainan                                             | E                   | WP                       | - <sup>e</sup> | No             | U              | 37             | Yes             | N                             | 89854              | 9705            | 10.8     |
| 24  | 2015             | Ji Deyong      | Chinese  | 2013       | Anhui                                              | C                   | HS                       | U              | Yes            | 28             | 37             | Yes             | N                             | 6151               | 664             | 10.8     |
| 25  | 2012             | Liu Lei        | Chinese  | 2010       | Anhui                                              | C                   | HS                       | 3              | Yes            | U              | 37             | Yes             | W                             | 702                | 74              | 10.5     |
| 26  | 2015             | Xu Haiqing     | English  | 2012       | Hubei                                              | C                   | PS                       | -              | No             | U              | 37             | Yes             | N                             | NA <sup>f</sup>    | NA              | 10.5     |
| 27  | 2018             | Hou Xiaojing   | Chinese  | 2015       | Shanghai                                           | E                   | HS                       | 3              | No             | 28             | 37             | U               | W                             | 600                | 62              | 10.3     |
| 28  | 2015             | Peng Tingting  | Chinese  | 2013       | Shanxi                                             | C                   | HS                       | 3              | Yes            | 28             | 37             | Yes             | N                             | 4804               | 494             | 10.3     |
| 29  | 2018             | Zhao Xiaoli    | Chinese  | 2012       | Guangdong                                          | E                   | PS                       | -              | No             | U              | 37             | Yes             | N                             | 786                | 80              | 10.2     |
| 30  | 2015             | Zhang Xiaobin  | Chinese  | 2012       | Xinjiang                                           | W                   | HS                       | 3              | No             | 28             | 37             | U               | W                             | 10880              | 1100            | 10.1     |
| 31  | 2012             | Yu Yanhua      | Chinese  | 2010       | Guangdong                                          | E                   | HS                       | 3              | No             | 28             | 37             | U               | W                             | 2436               | 244             | 10.0     |
| 32  | 2016             | Liu Xiaohui    | English  | 2011       | Gansu                                              | W                   | HS                       | 3              | Yes            | 27 or less     | 37             | Yes             | W                             | 10179              | 1019            | 10.0     |
| 33  | 2019             | Xu Fengdan     | English  | 2014       | China                                              | China               | HS                       | U              | No             | 27 or less     | 37             | Yes             | N                             | 138247             | 13701           | 9.9      |
| 34  | 2014             | Liu Xiyong     | Chinese  | 2012       | Zhejiang                                           | E                   | HS                       | 3              | No             | 28             | 37             | Yes             | N                             | 13381              | 1325            | 9.9      |
| 35  | 2012             | Zhu Yan        | Chinese  | 2011       | China                                              | China               | HS                       | U              | No             | U              | 37             | Yes             | N                             | 106078             | 10498           | 9.9      |
| 36  | 2016             | Zhang Xiaosong | Chinese  | 2012       | Beijing, Guangdong, Hunan, Hubei, Sichuan, Shaanxi | Cross               | HS                       | U              | No             | 27 or less     | 37             | Yes             | W                             | 111095             | 10986           | 9.9      |

| No. | Publication year | First author             | Language | Study year | Study setting(s)         | Region <sup>a</sup> | Data source <sup>b</sup> | HS level | Singleton only | Lower boundary | Upper boundary | Live birth only | Unit of analysis <sup>c</sup> | Total participants | Number of cases | Rate (%) |
|-----|------------------|--------------------------|----------|------------|--------------------------|---------------------|--------------------------|----------|----------------|----------------|----------------|-----------------|-------------------------------|--------------------|-----------------|----------|
| 37  | 2015             | Xu Xiaoying              | Chinese  | 2011       | Gansu                    | W                   | HS                       | 3        | Yes            | 28             | 37             | Yes             | W                             | 6181               | 608             | 9.8      |
| 38  | 2016             | MCT for RDS <sup>g</sup> | Chinese  | 2013       | China                    | China               | HS                       | U        | No             | 27 or less     | 37             | Yes             | N                             | 62880              | 6017            | 9.6      |
| 39  | 2018             | Han Yingying             | English  | 2015       | Jiangsu                  | E                   | HS                       | 3        | Yes            | 28             | 37             | Yes             | N                             | 6693               | 638             | 9.5      |
| 40  | 2019             | Chen Chang               | English  | 2016       | China                    | China               | HS                       | U        | No             | 27 or less     | 37             | No              | N                             | 75590              | 7179            | 9.5      |
| 41  | 2017             | Sun Pengfei              | English  | 2013       | Hebei                    | E                   | WP                       | -        | No             | U              | 37             | Yes             | N                             | 67718              | 6213            | 9.2      |
| 42  | 2016             | Jiang Fang               | Chinese  | 2012       | Beijing                  | E                   | HS                       | 3        | No             | 27 or less     | 37             | U               | N                             | 14544              | 1328            | 9.1      |
| 43  | 2014             | Zhou Xin                 | Chinese  | 2011       | Jiangsu                  | E                   | HS                       | 3        | No             | 28             | 37             | Yes             | W                             | 11302              | 1030            | 9.1      |
| 44  | 2019             | Liu Xijuan               | Chinese  | 2017       | Zhejiang                 | E                   | HS                       | 3        | No             | 27 or less     | 37             | Yes             | N                             | 19800              | 1800            | 9.1      |
| 45  | 2017             | Li Pengcheng             | Chinese  | 2015       | Hubei, Gansu             | Cross               | HS                       | U        | No             | U              | 37             | Yes             | W                             | 29712              | 2662            | 9.0      |
| 46  | 2018             | Yu Honghui               | English  | 2013       | Hubei                    | C                   | HS                       | U        | No             | U              | 37             | No              | W                             | 797                | 71              | 8.9      |
| 47  | 2013             | Tian Qing                | Chinese  | 2011       | Guangdong                | E                   | HS                       | U        | No             | U              | 37             | Yes             | N                             | 34572              | 3045            | 8.8      |
| 48  | 2016             | Zhong Shilin             | Chinese  | 2012       | Guangdong                | E                   | HS                       | 3        | No             | 28             | 37             | Yes             | W                             | 19203              | 1688            | 8.8      |
| 49  | 2018             | Ke Li                    | English  | 2015       | Guangdong                | E                   | HS                       | 3        | Yes            | 27 or less     | 37             | Yes             | W                             | 3684               | 323             | 8.8      |
| 50  | 2016             | Liu Weiliang             | Chinese  | 2014       | Henan, Guangxi, Shanghai | Cross               | HS                       | U        | No             | 28             | 37             | U               | W                             | 6000               | 650             | 8.8      |
| 51  | 2015             | Shen Chongrong           | Chinese  | 2013       | Jiangsu                  | E                   | HS                       | 2        | No             | 28             | 37             | No              | W                             | 1564               | 136             | 8.7      |
| 52  | 2015             | Fernando C. Barros       | English  | 2011       | Beijing                  | E                   | HS                       | U        | No             | 27 or less     | 37             | U               | N                             | 6510               | 547             | 8.4      |
| 53  | 2016             | Zhao Qianqian            | Chinese  | 2012       | Beijing                  | E                   | HS                       | 3        | No             | 27 or less     | 37             | No              | W                             | 11142              | 930             | 8.3      |
| 54  | 2014             | Zhou J                   | English  | 2011       | Guangdong                | E                   | HS                       | 3        | No             | U              | 37             | Yes             | W                             | 1953               | 159             | 8.1      |

| No.             | Publication year | First author  | Language | Study year | Study setting(s)                                                                     | Region <sup>a</sup> | Data source <sup>b</sup> | HS level | Singleton only | Lower boundary | Upper boundary | Live birth only | Unit of analysis <sup>c</sup> | Total participants | Number of cases | Rate (%) |
|-----------------|------------------|---------------|----------|------------|--------------------------------------------------------------------------------------|---------------------|--------------------------|----------|----------------|----------------|----------------|-----------------|-------------------------------|--------------------|-----------------|----------|
| 55              | 2017             | Dong Renjing  | Chinese  | 2013       | Jilin                                                                                | NE                  | HS                       | 3        | No             | 28             | 37             | U               | W                             | 14243              | 1149            | 8.1      |
| 56              | 2013             | Feng Fangfang | Chinese  | 2011       | Hubei                                                                                | C                   | HS                       | 3        | No             | 28             | 37             | Yes             | W                             | 1400               | 110             | 7.9      |
| 57              | 2017             | Zhuang Xun    | English  | 2014       | Jiangsu                                                                              | E                   | HS                       | 3        | Yes            | 27 or less     | 37             | No              | W                             | 36755              | 2875            | 7.8      |
| 58              | 2017             | Liu Yajun     | English  | 2011       | Beijing, Jilin, Liaoning, Shanxi, Hebei, Inner Mongolia, Shandong, Shaanxi, Xinjiang | Cross               | HS                       | U        | Yes            | 28             | 37             | Yes             | N                             | 65173              | 5092            | 7.8      |
| 59              | 2013             | Sun Jianhua   | Chinese  | 2011       | Liaoning                                                                             | NE                  | HS                       | U        | No             | 28             | 37             | U               | W                             | 2370               | 184             | 7.8      |
| 60              | 2018             | Yan Junmei    | Chinese  | 2013       | Jiangsu                                                                              | E                   | HS                       | 3        | No             | 27 or less     | 37             | Yes             | N                             | 60730              | 4698            | 7.7      |
| 61              | 2017             | Zeng Lixiang  | Chinese  | 2015       | Guangdong                                                                            | E                   | HS                       | 3        | No             | 28             | 37             | No              | N                             | 34082              | 2616            | 7.7      |
| 62              | 2017             | Tan Jing      | English  | 2010       | Sichuan                                                                              | W                   | HS                       | U        | Yes            | U              | 37             | U               | W                             | 21942              | 1684            | 7.7      |
| 63 <sup>h</sup> | 2017             | Guo Tongjun   | Chinese  | 2012       | Hunan                                                                                | C                   | PS                       | -        | Yes            | U              | 37             | Yes             | W                             | 55654              | 4212            | 7.6      |
| 64              | 2015             | Chen Ping     | Chinese  | 2013       | Zhejiang                                                                             | E                   | HS                       | U        | Yes            | 28             | 37             | U               | W                             | 1958               | 148             | 7.6      |
| 65              | 2015             | Liu Lu        | English  | 2014       | Beijing                                                                              | E                   | HS                       | 3        | Yes            | U              | 37             | Yes             | W                             | 2973               | 223             | 7.5      |
| 66              | 2018             | Huang Xin     | English  | 2016       | Hunan                                                                                | C                   | WP                       | -        | Yes            | U              | 37             | Yes             | W                             | 16780              | 1249            | 7.4      |
| 67              | 2017             | Tang Wen      | English  | 2013       | China                                                                                | China               | HS                       | U        | No             | 28             | 37             | Yes             | N                             | 3915965            | 289381          | 7.4      |
| 68              | 2016             | Xu Rong       | Chinese  | 2012       | Jiangsu                                                                              | E                   | WP                       | -        | Yes            | U              | 37             | Yes             | W                             | 157187             | 11530           | 7.3      |
| 69              | 2012             | Lu Rongxian   | Chinese  | 2011       | Zhejiang                                                                             | E                   | HS                       | 3        | No             | 28             | 37             | Yes             | W                             | 3316               | 243             | 7.3      |
| 70              | 2018             | Wang Xiaojie  | Chinese  | 2017       | Guangdong                                                                            | E                   | HS                       | 3        | No             | 27 or less     | 37             | Yes             | N                             | 6011               | 439             | 7.3      |
| 71              | 2017             | Wang Shiwen   | English  | 2012       | Shandong                                                                             | E                   | HS                       | U        | No             | U              | 37             | Yes             | N                             | 10933              | 793             | 7.3      |

| No. | Publication year | First author  | Language | Study year | Study setting(s)                        | Region <sup>a</sup> | Data source <sup>b</sup> | HS level | Singleton only | Lower boundary | Upper boundary | Live birth only | Unit of analysis <sup>c</sup> | Total participants | Number of cases | Rate (%) |
|-----|------------------|---------------|----------|------------|-----------------------------------------|---------------------|--------------------------|----------|----------------|----------------|----------------|-----------------|-------------------------------|--------------------|-----------------|----------|
| 72  | 2013             | Yi Lilan      | Chinese  | 2012       | Beijing, Heilongjiang, Hunan, Guangdong | Cross               | HS                       | U        | Yes            | U              | 37             | Yes             | N                             | 5539               | 399             | 7.2      |
| 73  | 2016             | Du Huijuan    | Chinese  | 2013       | Hebei                                   | E                   | HS                       | 2        | No             | U              | 37             | Yes             | N                             | 10644              | 764             | 7.2      |
| 74  | 2018             | Guo Tongjun   | English  | 2012       | China                                   | China               | PS                       | -        | Yes            | 27 or less     | 37             | Yes             | N                             | 1020471            | 73240           | 7.2      |
| 75  | 2016             | Ding Jie      | Chinese  | 2014       | Beijing                                 | E                   | HS                       | 3        | Yes            | 28             | 37             | Yes             | W                             | 642                | 46              | 7.2      |
| 76  | 2015             | Luo Xiaolin   | English  | 2011       | China                                   | China               | HS                       | U        | No             | 28             | 37             | No              | W                             | 111767             | 7872            | 7.0      |
| 77  | 2018             | Liu Yiwen     | Chinese  | 2011       | Hebei                                   | E                   | PS                       | -        | Yes            | 28             | 37             | U               | W                             | 993                | 69              | 6.9      |
| 78  | 2017             | Kang Huixian  | Chinese  | 2012       | Beijing                                 | E                   | HS                       | 3        | Yes            | 28             | 37             | Yes             | W                             | 1126               | 78              | 6.9      |
| 79  | 2019             | Yuan Xiaosong | English  | 2016       | Jiangsu                                 | E                   | HS                       | 3        | Yes            | 28             | 37             | Yes             | W                             | 11576              | 797             | 6.9      |
| 80  | 2016             | Xue Qinqin    | English  | 2011       | Shanghai                                | E                   | HS                       | 3        | No             | 27 or less     | 37             | Yes             | W                             | 37443              | 2541            | 6.8      |
| 81  | 2013             | Liu Jingli    | Chinese  | 2012       | Jilin                                   | NE                  | HS                       | U        | No             | 28             | 37             | U               | W                             | 3141               | 211             | 6.7      |
| 82  | 2018             | Xu Qin        | English  | 2015       | China                                   | China               | PS                       | -        | No             | 28             | 37             | No              | W                             | 4832887            | 324207          | 6.7      |
| 83  | 2013             | Ren Dafeng    | Chinese  | 2011       | Jiangsu                                 | E                   | HS                       | 3        | No             | 28             | 37             | U               | W                             | 4360               | 292             | 6.7      |
| 84  | 2014             | Shan Xiaoyi   | English  | 2010       | Beijing                                 | E                   | HS                       | U        | No             | U              | 37             | Yes             | N                             | 22507              | 1496            | 6.6      |
| 85  | 2016             | Yu Huiting    | Chinese  | 2015       | Shanghai                                | E                   | WP                       | -        | No             | U              | 37             | Yes             | W                             | 191100             | 12513           | 6.5      |
| 86  | 2019             | Yan Huina     | English  | 2013       | Beijing                                 | E                   | HS                       | 2        | Yes            | 27 or less     | 37             | Yes             | W                             | 3688               | 241             | 6.5      |
| 87  | 2013             | Wang Chengshu | Chinese  | 2011       | Beijing                                 | E                   | HS                       | 3        | Yes            | 28             | 37             | Yes             | W                             | 4090               | 261             | 6.4      |
| 88  | 2017             | Li Shanshan   | Chinese  | 2016       | Guangxi                                 | W                   | HS                       | 3        | No             | U              | 37             | Yes             | W                             | 1547               | 98              | 6.3      |
| 89  | 2017             | Xin Qianqian  | English  | 2013       | China                                   | China               | HS                       | U        | No             | U              | 37             | Yes             | N                             | 21994              | 1392            | 6.3      |
| 90  | 2019             | Guan Tianjia  | English  | 2010       | Beijing                                 | E                   | HS                       | 2        | No             | 27 or less     | 37             | Yes             | N                             | 82000              | 5166            | 6.3      |

| No. | Publication year | First author  | Language | Study year | Study setting(s) | Region <sup>a</sup> | Data source <sup>b</sup> | HS level | Singleton only | Lower boundary | Upper boundary | Live birth only | Unit of analysis <sup>c</sup> | Total participants | Number of cases | Rate (%) |
|-----|------------------|---------------|----------|------------|------------------|---------------------|--------------------------|----------|----------------|----------------|----------------|-----------------|-------------------------------|--------------------|-----------------|----------|
| 91  | 2014             | Guo Yong      | English  | 2012       | Guangdong        | E                   | WP                       | -        | Yes            | 28             | 37             | Yes             | W                             | 54575              | 3384            | 6.2      |
| 92  | 2018             | Ye Lin        | English  | 2014       | Jiangsu          | E                   | WP                       | -        | Yes            | U              | 37             | Yes             | W                             | 24246              | 1501            | 6.2      |
| 93  | 2016             | Han Shujing   | English  | 2013       | Beijing          | E                   | HS                       | 3        | No             | U              | 37             | Yes             | N                             | 37573              | 2294            | 6.1      |
| 94  | 2018             | Li Changchang | English  | 2011       | Guangdong        | E                   | WP                       | -        | No             | 27 or less     | 37             | Yes             | N                             | 587829             | 34946           | 5.9      |
| 95  | 2019             | Yang M.       | English  | 2014       | Sichuan          | W                   | HS                       | U        | Yes            | U              | 37             | Yes             | W                             | 4340               | 252             | 5.8      |
| 96  | 2016             | Zhang Dandan  | Chinese  | 2013       | Hubei            | C                   | HS                       | 3        | Yes            | 28             | 37             | Yes             | W                             | 11020              | 630             | 5.7      |
| 97  | 2015             | Yu Rong       | Chinese  | 2012       | Beijing          | E                   | HS                       | 3        | No             | 28             | 37             | Yes             | W                             | 10678              | 588             | 5.5      |
| 98  | 2018             | Zhao Jinqi    | Chinese  | 2014       | Beijing          | E                   | WP                       | -        | No             | U              | 37             | Yes             | N                             | 1366377            | 74994           | 5.5      |
| 99  | 2019             | Su Weijuan    | English  | 2014       | Fujian           | E                   | WP                       | -        | No             | U              | 37             | No              | W                             | 62852              | 3350            | 5.3      |
| 100 | 2013             | Zheng Feng    | Chinese  | 2011       | Liaoning         | NE                  | HS                       | U        | No             | 28             | 37             | Yes             | W                             | 5472               | 290             | 5.3      |
| 101 | 2017             | Xia Min       | English  | 2012       | Shandong         | E                   | HS                       | 3        | No             | 27 or less     | 37             | No              | W                             | 10868              | 571             | 5.3      |
| 102 | 2018             | Xu Jing       | English  | 2016       | Shandong         | E                   | HS                       | 3        | Yes            | U              | 37             | No              | W                             | 4552               | 239             | 5.3      |
| 103 | 2017             | Wang Chen     | Chinese  | 2013       | Beijing          | E                   | HS                       | U        | Yes            | 28             | 37             | Yes             | W                             | 14970              | 785             | 5.2      |
| 104 | 2018             | Li Xiangyu    | English  | 2015       | Hubei            | C                   | HS                       | U        | Yes            | 28             | 37             | Yes             | N                             | 10635              | 557             | 5.2      |
| 105 | 2019             | Wei Liangjia  | Chinese  | 2016       | Guangxi          | W                   | HS                       | U        | Yes            | 28             | 37             | Yes             | W                             | 12780              | 668             | 5.2      |
| 106 | 2017             | Ye Juan       | Chinese  | 2015       | Guangxi          | W                   | HS                       | U        | Yes            | 28             | 37             | U               | W                             | 2463               | 125             | 5.1      |
| 107 | 2013             | Xu Hairong    | Chinese  | 2010       | Guangdong        | E                   | HS                       | 2        | No             | 28             | 37             | U               | W                             | 1785               | 90              | 5.0      |
| 108 | 2019             | Lin Xianhua   | English  | 2014       | Shanghai         | E                   | HS                       | 3        | Yes            | 28             | 37             | Yes             | W                             | 49612              | 2494            | 5.0      |
| 109 | 2017             | Hu Ronghua    | English  | 2013       | Hubei            | C                   | WP                       | -        | Yes            | 28             | 37             | Yes             | W                             | 317463             | 15889           | 5.0      |
| 110 | 2015             | Bo Sun        | Chinese  | 2012       | Shaanxi          | W                   | WP                       | -        | No             | U              | 37             | U               | N                             | 383976             | 19198           | 5.0      |

| No. | Publication year | First author   | Language | Study year | Study setting(s)            | Region <sup>a</sup> | Data source <sup>b</sup> | HS level | Singleton only | Lower boundary | Upper boundary | Live birth only | Unit of analysis <sup>c</sup> | Total participants | Number of cases | Rate (%) |
|-----|------------------|----------------|----------|------------|-----------------------------|---------------------|--------------------------|----------|----------------|----------------|----------------|-----------------|-------------------------------|--------------------|-----------------|----------|
| 111 | 2019             | Guo Pi         | English  | 2015       | Guangdong                   | E                   | WP                       | -        | Yes            | U              | 37             | Yes             | N                             | 1098600            | 54521           | 5.0      |
| 112 | 2019             | Liu Tao        | Chinese  | 2017       | Guangxi                     | W                   | HS                       | U        | No             | 28             | 37             | U               | W                             | 21891              | 1080            | 4.9      |
| 113 | 2018             | He Jianrong    | English  | 2013       | Guangdong                   | E                   | HS                       | 3        | Yes            | U              | 37             | Yes             | W                             | 9044               | 444             | 4.9      |
| 114 | 2017             | Yang Wenjia    | English  | 2012       | Beijing                     | E                   | HS                       | 3        | Yes            | U              | 37             | No              | W                             | 979                | 48              | 4.9      |
| 115 | 2017             | Liu Shiping    | English  | 2015       | Hunan                       | C                   | PS                       | -        | No             | U              | 37             | Yes             | W                             | 882                | 43              | 4.9      |
| 116 | 2018             | Xiao Yue       | English  | 2013       | Liaoning                    | NE                  | HS                       | U        | Yes            | U              | 37             | Yes             | W                             | 1569               | 76              | 4.8      |
| 117 | 2013             | Li Guijuan     | Chinese  | 2011       | Shandong                    | E                   | HS                       | 2        | No             | U              | 37             | Yes             | W                             | 4214               | 202             | 4.8      |
| 118 | 2019             | Dai Xiaowei    | Chinese  | 2016       | Guangdong                   | E                   | HS                       | 3        | Yes            | U              | 37             | Yes             | W                             | 1377               | 66              | 4.8      |
| 119 | 2018             | Wang Chen      | English  | 2014       | Beijing, Guangdong, Sichuan | Cross               | HS                       | U        | Yes            | U              | 37             | U               | W                             | 21577              | 1027            | 4.8      |
| 120 | 2018             | Tang Jiangbing | Chinese  | 2013       | Zhejiang                    | E                   | HS                       | U        | No             | U              | 37             | U               | N                             | 79850              | 3778            | 4.7      |
| 121 | 2017             | Li Run         | English  | 2013       | Sichuan                     | W                   | HS                       | U        | Yes            | U              | 37             | Yes             | W                             | 688                | 32              | 4.7      |
| 122 | 2018             | Wang Yaocheng  | Chinese  | 2014       | Zhejiang                    | E                   | WP                       | -        | No             | 28             | 37             | Yes             | N                             | 120819             | 5532            | 4.6      |
| 123 | 2015             | Pan Lei        | English  | 2011       | Tianjin                     | E                   | WP                       | -        | Yes            | U              | 37             | Yes             | W                             | 17545              | 803             | 4.6      |
| 124 | 2019             | Hu Jie         | English  | 2014       | Hubei                       | C                   | HS                       | 3        | Yes            | 28             | 37             | Yes             | W                             | 16345              | 721             | 4.4      |
| 125 | 2018             | Xiao Qingyang  | English  | 2012       | Shanghai                    | E                   | WP                       | -        | Yes            | 27 or less     | 37             | Yes             | N                             | 132783             | 5856            | 4.4      |
| 126 | 2014             | He Jifei       | Chinese  | 2011       | Chongqing                   | W                   | HS                       | U        | No             | 28             | 37             | U               | W                             | 8567               | 366             | 4.3      |
| 127 | 2015             | Xue Xiaoping   | Chinese  | 2010       | Shanxi                      | C                   | WP                       | -        | Yes            | 28             | 37             | Yes             | N                             | 50871              | 2163            | 4.3      |
| 128 | 2014             | Xu Xin         | Chinese  | 2011       | Hunan                       | C                   | HS                       | U        | No             | 28             | 37             | Yes             | W                             | 6270               | 265             | 4.2      |
| 129 | 2012             | Yang Qing      | Chinese  | 2010       | Shanghai                    | E                   | HS                       | 2        | No             | U              | 37             | Yes             | N                             | 9741               | 409             | 4.2      |
| 130 | 2016             | Long Xinzhi    | Chinese  | 2015       | Guangdong                   | E                   | HS                       | 2        | No             | 28             | 37             | U               | W                             | 2000               | 83              | 4.2      |

| No. | Publication year | First author   | Language | Study year | Study setting(s)                                | Region <sup>a</sup> | Data source <sup>b</sup> | HS level | Singleton only | Lower boundary | Upper boundary | Live birth only | Unit of analysis <sup>c</sup> | Total participants | Number of cases | Rate (%) |
|-----|------------------|----------------|----------|------------|-------------------------------------------------|---------------------|--------------------------|----------|----------------|----------------|----------------|-----------------|-------------------------------|--------------------|-----------------|----------|
| 131 | 2013             | Guo Yawei      | Chinese  | 2011       | Hunan                                           | C                   | PS                       | -        | No             | 28             | 37             | U               | W                             | 6270               | 259             | 4.1      |
| 132 | 2015             | Zhang Cuihong  | English  | 2012       | Beijing                                         | E                   | HS                       | U        | Yes            | U              | 37             | Yes             | W                             | 14196              | 586             | 4.1      |
| 133 | 2019             | Zhu Beibei     | English  | 2014       | Anhui                                           | C                   | HS                       | 2        | Yes            | U              | 37             | Yes             | W                             | 3273               | 134             | 4.1      |
| 134 | 2018             | Ding Haiyan    | Chinese  | 2013       | Zhejiang                                        | E                   | WP                       | -        | No             | 27 or less     | 37             | No              | N                             | 18276              | 748             | 4.1      |
| 135 | 2016             | Wang Fen       | Chinese  | 2012       | Hubei                                           | C                   | HS                       | 3        | No             | 28             | 37             | Yes             | W                             | 24145              | 986             | 4.1      |
| 136 | 2019             | Ma Haihui      | Chinese  | 2015       | Beijing                                         | E                   | HS                       | 2        | Yes            | 27 or less     | 37             | Yes             | W                             | 34726              | 1418            | 4.1      |
| 137 | 2015             | Zhou Miao      | Chinese  | 2014       | Liaoning, Sichuan                               | Cross               | WP                       | -        | No             | 28             | 37             | Yes             | W                             | 7171               | 289             | 4.0      |
| 138 | 2018             | Tian Jiarong   | Chinese  | 2015       | Guangxi                                         | W                   | WP                       | -        | Yes            | 28             | 37             | Yes             | W                             | 10122              | 404             | 4.0      |
| 139 | 2017             | Zhao Yanjie    | Chinese  | 2012       | Jiangsu                                         | E                   | WP                       | -        | No             | U              | 37             | Yes             | N                             | 34022              | 1339            | 3.9      |
| 140 | 2018             | Wang H.        | English  | 2012       | Jiangsu                                         | E                   | WP                       | -        | No             | 27 or less     | 37             | No              | N                             | 119454             | 4643            | 3.9      |
| 141 | 2018             | Hu Chengyang   | English  | 2011       | Anhui                                           | C                   | PS                       | -        | No             | 27 or less     | 37             | Yes             | W                             | 16983              | 656             | 3.9      |
| 142 | 2018             | Zheng Wei      | English  | 2014       | Beijing                                         | E                   | HS                       | 3        | Yes            | U              | 37             | Yes             | N                             | 10366              | 400             | 3.9      |
| 143 | 2018             | Huang Aiqun    | English  | 2014       | Hebei, Liaoning, Hunan, Fujian, Sichuan, Yunnan | Cross               | WP                       | -        | Yes            | U              | 37             | Yes             | W                             | 40152              | 1331            | 3.8      |
| 144 | 2014             | Fei Lixiao     | Chinese  | 2013       | Henan                                           | C                   | WP                       | -        | No             | 27 or less     | 37             | U               | W                             | 19120              | 727             | 3.8      |
| 145 | 2017             | Fang Haiqin    | Chinese  | 2015       | Jiangsu                                         | E                   | WP                       | -        | No             | 28             | 37             | Yes             | N                             | 10241              | 369             | 3.6      |
| 146 | 2018             | Yang Jin       | English  | 2015       | Henan                                           | C                   | HS                       | U        | Yes            | U              | 37             | Yes             | W                             | 2320               | 82              | 3.5      |
| 147 | 2015             | Wen Tingyuan   | English  | 2011       | Beijing                                         | E                   | HS                       | 3        | Yes            | U              | 37             | U               | W                             | 13776              | 485             | 3.5      |
| 148 | 2015             | Jia Xiaomin    | Chinese  | 2011       | Anhui                                           | C                   | HS                       | 3        | Yes            | 28             | 37             | Yes             | W                             | 2729               | 96              | 3.5      |
| 149 | 2014             | Chen Liangmiao | English  | 2010       | Zhejiang                                        | E                   | HS                       | 3        | No             | 28             | 37             | No              | W                             | 8012               | 281             | 3.5      |

| No.                 | Publication year | First author | Language | Study year | Study setting(s) | Region <sup>a</sup> | Data source <sup>b</sup> | HS level | Singleton only | Lower boundary | Upper boundary | Live birth only | Unit of analysis <sup>c</sup> | Total participants | Number of cases | Rate (%) |
|---------------------|------------------|--------------|----------|------------|------------------|---------------------|--------------------------|----------|----------------|----------------|----------------|-----------------|-------------------------------|--------------------|-----------------|----------|
| 150                 | 2017             | Fan Xiaojing | English  | 2011       | Tibet            | W                   | PS                       | -        | Yes            | 28             | 37             | Yes             | W                             | 701                | 23              | 3.3      |
| 151                 | 2019             | Fang Jing    | English  | 2014       | Hubei            | C                   | HS                       | 3        | Yes            | U              | 37             | Yes             | W                             | 1028               | 33              | 3.2      |
| 152                 | 2014             | Li Yanhua    | Chinese  | 2010       | Fujian           | E                   | HS                       | 3        | Yes            | U              | 37             | Yes             | W                             | 592                | 19              | 3.2      |
| 153                 | 2019             | Li Minmin    | Chinese  | 2012       | Shaanxi          | W                   | PS                       | -        | Yes            | U              | 37             | Yes             | W                             | 28841              | 894             | 3.1      |
| 154                 | 2016             | Hu Yan       | Chinese  | 2013       | Hubei            | C                   | HS                       | 3        | No             | 28             | 37             | Yes             | W                             | 5242               | 160             | 3.1      |
| 155                 | 2016             | Jin Wenyuan  | English  | 2011       | Zhejiang         | E                   | HS                       | 3        | Yes            | 28             | 37             | Yes             | W                             | 934                | 27              | 2.9      |
| 156                 | 2018             | Zhao Xiang   | Chinese  | 2017       | Shandong         | E                   | HS                       | 3        | Yes            | U              | 37             | Yes             | W                             | 1300               | 37              | 2.8      |
| 157 <sup>h</sup>    | 2017             | Guo Tongjun  | English  | 2014       | Henan            | C                   | PS                       | -        | Yes            | U              | 37             | U               | N                             | 244305             | 6709            | 2.7      |
| 158                 | 2016             | Guo Yanwei   | Chinese  | 2010       | Hebei            | E                   | HS                       | U        | No             | 28             | 37             | No              | W                             | 4966               | 131             | 2.6      |
| 159                 | 2014             | Wang Jing    | Chinese  | 2012       | Beijing          | E                   | HS                       | 2        | No             | U              | 37             | U               | W                             | 4042               | 103             | 2.5      |
| 160                 | 2016             | Jiang Yan    | Chinese  | 2010       | Guangdong        | E                   | HS                       | 2        | No             | U              | 37             | U               | W                             | 5000               | 120             | 2.4      |
| 161                 | 2013             | Wang Mei     | Chinese  | 2011       | Ningxia          | W                   | HS                       | 2        | Yes            | U              | 37             | Yes             | W                             | 600                | 13              | 2.2      |
| 162                 | 2019             | Wang Feixue  | Chinese  | 2016       | Zhejiang         | E                   | PS                       | -        | No             | U              | 37             | Yes             | W                             | 520695             | 8151            | 1.6      |
| CR <sup>i</sup> (%) | 99.4             | 95.7         | 100.0    | 90.7       | 96.9             | -                   | 91.4                     | -        | 96.9           | 73.5           | 92.6           | 73.5            | 86.4                          | 84.0               | 87.0            | 79.0     |

<sup>a</sup> “NE”: Northeastern China; “E”: Eastern China; “C”: Central China; “W”: Western China.

<sup>b</sup> “WP”: Whole population; “PS”: Population sample; “HS”: Hospital.

<sup>c</sup> “N”: Neonate; “W”: Woman.

<sup>d</sup> “U”: Unknown. Hospital level of hospital-based studies was unknown if: 1) it could not be determined according to the online system, 2) there was no specific hospital name provided, 3) hospitals were of different types.

<sup>e</sup> “-”: Not applicable, including: 1) hospital level for studies from whole population or population sample; 2) consistency rates for region and hospital level, as they were not directly extracted from studies.



<sup>f</sup>Data were unobtainable.

<sup>g</sup> “MCT for RDS”: Multicenter Collaborative Team for the Respiratory Distress Syndrome.

<sup>h</sup> See eText2 by No. for details on two studies with same publication year and first author.

<sup>i</sup> “CR”: Consistency rate (of data extraction between two reviewers), the percentage of studies from which the data extracted by the two reviewers were consistent relative to the total number of studies included.

eTable3. Study quality assessment (n=162)

| No. | Publication year | First author         | The 9 domains of Joanna Briggs Institute Critical Appraisal Checklist |                              |                          |                                              |                                         |                                    |                          |                                   |                            |
|-----|------------------|----------------------|-----------------------------------------------------------------------|------------------------------|--------------------------|----------------------------------------------|-----------------------------------------|------------------------------------|--------------------------|-----------------------------------|----------------------------|
|     |                  |                      | Sample frame <sup>a</sup>                                             | Sampling method <sup>b</sup> | Sample size <sup>c</sup> | Subject and setting description <sup>d</sup> | Identified sample coverage <sup>e</sup> | Identification method <sup>f</sup> | Measurement <sup>g</sup> | Statistical analysis <sup>h</sup> | Response rate <sup>i</sup> |
| 1   | 2013             | Hu Chunxia           | No                                                                    | Yes                          | No                       | No                                           | Yes                                     | Yes                                | Yes                      | Yes                               | Yes                        |
| 2   | 2015             | Zhu Tong             | No                                                                    | Yes                          | No                       | Yes                                          | Unclear                                 | Yes                                | Yes                      | Yes                               | No                         |
| 3   | 2014             | Kong Dechuan         | No                                                                    | Yes                          | No                       | Yes                                          | Yes                                     | Yes                                | Yes                      | Yes                               | Yes                        |
| 4   | 2013             | Zhou Shenglan        | No                                                                    | Yes                          | Yes                      | Yes                                          | Unclear                                 | Yes                                | Yes                      | Yes                               | Unclear                    |
| 5   | 2017             | Reyihanguli Maimaiti | No                                                                    | Yes                          | Yes                      | Yes                                          | Yes                                     | Yes                                | Yes                      | Yes                               | Yes                        |
| 6   | 2017             | Guo Yanwei           | No                                                                    | Yes                          | Yes                      | Yes                                          | Yes                                     | Yes                                | Yes                      | Yes                               | Yes                        |
| 7   | 2016             | Yang Yinxia          | No                                                                    | Yes                          | Yes                      | No                                           | Yes                                     | Yes                                | Yes                      | Yes                               | Yes                        |
| 8   | 2016             | Li Yanhong           | No                                                                    | Yes                          | Yes                      | No                                           | Yes                                     | Yes                                | Yes                      | Yes                               | Yes                        |
| 9   | 2016             | Lei Qiong            | No                                                                    | Yes                          | Yes                      | Yes                                          | Yes                                     | Yes                                | Yes                      | Yes                               | Yes                        |
| 10  | 2018             | Liu Wenyuan          | No                                                                    | Yes                          | Yes                      | Yes                                          | Yes                                     | Yes                                | Yes                      | Yes                               | Yes                        |
| 11  | 2015             | Guo Yeqing           | No                                                                    | Yes                          | No                       | Yes                                          | Yes                                     | Yes                                | Yes                      | Yes                               | Yes                        |
| 12  | 2014             | Lei Qiong            | No                                                                    | Yes                          | Yes                      | Yes                                          | Yes                                     | Yes                                | Yes                      | Yes                               | Yes                        |
| 13  | 2018             | Zhu Hui              | No                                                                    | Yes                          | No                       | Yes                                          | Yes                                     | Yes                                | Yes                      | Yes                               | Yes                        |
| 14  | 2017             | Zhang Yihui          | No                                                                    | Yes                          | Yes                      | Yes                                          | Yes                                     | Yes                                | Yes                      | Yes                               | Yes                        |
| 15  | 2013             | Zhang Jingjing       | No                                                                    | Yes                          | No                       | Yes                                          | Unclear                                 | Yes                                | Yes                      | Yes                               | Unclear                    |
| 16  | 2018             | Huang Huafei         | No                                                                    | Yes                          | Yes                      | No                                           | Yes                                     | Yes                                | Yes                      | Yes                               | Yes                        |
| 17  | 2017             | Xiong Jiangjun       | No                                                                    | Yes                          | Yes                      | No                                           | Yes                                     | Yes                                | Yes                      | Yes                               | Yes                        |
| 18  | 2017             | Qin Jiabi            | No                                                                    | Yes                          | Yes                      | Yes                                          | Unclear                                 | Yes                                | Yes                      | Yes                               | No                         |

| No. | Publication year | First author   | The 9 domains of Joanna Briggs Institute Critical Appraisal Checklist |                              |                          |                                              |                                         |                                    |                          |                                   |                            |
|-----|------------------|----------------|-----------------------------------------------------------------------|------------------------------|--------------------------|----------------------------------------------|-----------------------------------------|------------------------------------|--------------------------|-----------------------------------|----------------------------|
|     |                  |                | Sample frame <sup>a</sup>                                             | Sampling method <sup>b</sup> | Sample size <sup>c</sup> | Subject and setting description <sup>d</sup> | Identified sample coverage <sup>e</sup> | Identification method <sup>f</sup> | Measurement <sup>g</sup> | Statistical analysis <sup>h</sup> | Response rate <sup>i</sup> |
| 19  | 2019             | Zhao Quming    | Yes                                                                   | No                           | Yes                      | Yes                                          | Yes                                     | Yes                                | Yes                      | Yes                               | Yes                        |
| 20  | 2015             | Zhu Li         | Yes                                                                   | No                           | Yes                      | Yes                                          | Yes                                     | Yes                                | Yes                      | Yes                               | Yes                        |
| 21  | 2018             | Wang Renhong   | No                                                                    | Yes                          | Yes                      | Yes                                          | Yes                                     | Yes                                | Yes                      | Yes                               | Yes                        |
| 22  | 2017             | Yan Yan        | No                                                                    | Yes                          | No                       | Yes                                          | Unclear                                 | Yes                                | Yes                      | Yes                               | Unclear                    |
| 23  | 2013             | Fan Lichun     | Yes                                                                   | Yes                          | Yes                      | No                                           | Yes                                     | Yes                                | Yes                      | Yes                               | Yes                        |
| 24  | 2015             | Ji Deyong      | No                                                                    | Yes                          | Yes                      | Yes                                          | Yes                                     | Yes                                | Yes                      | Yes                               | Yes                        |
| 25  | 2012             | Liu Lei        | No                                                                    | Yes                          | No                       | Yes                                          | Yes                                     | Yes                                | Yes                      | Yes                               | Yes                        |
| 26  | 2015             | Xu Haiqing     | Yes                                                                   | Yes                          | Yes                      | Yes                                          | Yes                                     | Yes                                | Yes                      | Yes                               | Yes                        |
| 27  | 2018             | Hou Xiaojing   | No                                                                    | Yes                          | No                       | Yes                                          | Yes                                     | Yes                                | Yes                      | Yes                               | Yes                        |
| 28  | 2015             | Peng Tingting  | No                                                                    | Yes                          | Yes                      | Yes                                          | Yes                                     | Yes                                | Yes                      | Yes                               | Yes                        |
| 29  | 2018             | Zhao Xiaoli    | Yes                                                                   | No                           | No                       | Yes                                          | Unclear                                 | Yes                                | Yes                      | Yes                               | Unclear                    |
| 30  | 2015             | Zhang Xiaobin  | No                                                                    | Yes                          | Yes                      | No                                           | Yes                                     | Yes                                | Yes                      | Yes                               | Yes                        |
| 31  | 2012             | Yu Yanhua      | No                                                                    | Yes                          | Yes                      | Yes                                          | Yes                                     | Yes                                | Yes                      | Yes                               | Yes                        |
| 32  | 2016             | Liu Xiaohui    | No                                                                    | Yes                          | Yes                      | Yes                                          | Unclear                                 | Yes                                | Yes                      | Yes                               | No                         |
| 33  | 2019             | Xu Fengdan     | Yes                                                                   | No                           | Yes                      | Yes                                          | Yes                                     | Yes                                | Yes                      | Yes                               | Yes                        |
| 34  | 2014             | Liu Xiyong     | No                                                                    | Yes                          | Yes                      | Yes                                          | Yes                                     | Yes                                | Yes                      | Yes                               | Yes                        |
| 35  | 2012             | Zhu Yan        | Yes                                                                   | No                           | Yes                      | Yes                                          | Yes                                     | Yes                                | Yes                      | Yes                               | Yes                        |
| 36  | 2016             | Zhang Xiaosong | No                                                                    | No                           | Yes                      | Yes                                          | Yes                                     | Yes                                | Yes                      | Yes                               | Yes                        |
| 37  | 2015             | Xu Xiaoying    | No                                                                    | Yes                          | Yes                      | Yes                                          | Yes                                     | Yes                                | Yes                      | Yes                               | Yes                        |

| No. | Publication year | First author       | The 9 domains of Joanna Briggs Institute Critical Appraisal Checklist |                              |                          |                                              |                                         |                                    |                          |                                   |                            |
|-----|------------------|--------------------|-----------------------------------------------------------------------|------------------------------|--------------------------|----------------------------------------------|-----------------------------------------|------------------------------------|--------------------------|-----------------------------------|----------------------------|
|     |                  |                    | Sample frame <sup>a</sup>                                             | Sampling method <sup>b</sup> | Sample size <sup>c</sup> | Subject and setting description <sup>d</sup> | Identified sample coverage <sup>e</sup> | Identification method <sup>f</sup> | Measurement <sup>g</sup> | Statistical analysis <sup>h</sup> | Response rate <sup>i</sup> |
| 38  | 2016             | MCT for RDS        | No                                                                    | Yes                          | Yes                      | Yes                                          | Yes                                     | Yes                                | Yes                      | Yes                               | Yes                        |
| 39  | 2018             | Han Yingying       | No                                                                    | Yes                          | Yes                      | Yes                                          | Yes                                     | Yes                                | Yes                      | Yes                               | Yes                        |
| 40  | 2019             | Chen Chang         | No                                                                    | No                           | Yes                      | Yes                                          | Yes                                     | Yes                                | Yes                      | Yes                               | Yes                        |
| 41  | 2017             | Sun Pengfei        | Yes                                                                   | Yes                          | Yes                      | No                                           | Yes                                     | Yes                                | Yes                      | Yes                               | Yes                        |
| 42  | 2016             | Jiang Fang         | No                                                                    | Yes                          | Yes                      | Yes                                          | Yes                                     | Yes                                | Yes                      | Yes                               | Yes                        |
| 43  | 2014             | Zhou Xin           | No                                                                    | Yes                          | Yes                      | No                                           | Yes                                     | Yes                                | Yes                      | Yes                               | Yes                        |
| 44  | 2019             | Liu Xijuan         | No                                                                    | Yes                          | Yes                      | Yes                                          | Yes                                     | Yes                                | Yes                      | Yes                               | Yes                        |
| 45  | 2017             | Li Pengcheng       | No                                                                    | No                           | Yes                      | Yes                                          | Yes                                     | Yes                                | Yes                      | Yes                               | Yes                        |
| 46  | 2018             | Yu Honghui         | No                                                                    | Yes                          | No                       | Yes                                          | Yes                                     | Yes                                | Yes                      | Yes                               | Yes                        |
| 47  | 2013             | Tian Qing          | No                                                                    | Yes                          | Yes                      | Yes                                          | Yes                                     | Yes                                | Yes                      | Yes                               | Yes                        |
| 48  | 2016             | Zhong Shilin       | No                                                                    | Yes                          | Yes                      | No                                           | Yes                                     | Yes                                | Yes                      | Yes                               | Yes                        |
| 49  | 2018             | Ke Li              | No                                                                    | Yes                          | Yes                      | Yes                                          | Yes                                     | Yes                                | Yes                      | Yes                               | Yes                        |
| 50  | 2016             | Liu Weiliang       | No                                                                    | Unclear                      | Yes                      | No                                           | Yes                                     | Yes                                | Yes                      | Yes                               | Yes                        |
| 51  | 2015             | Shen Chongrong     | No                                                                    | Yes                          | No                       | Yes                                          | Yes                                     | Yes                                | Yes                      | Yes                               | Yes                        |
| 52  | 2015             | Fernando C. Barros | No                                                                    | Yes                          | Yes                      | Yes                                          | Yes                                     | Yes                                | Yes                      | Yes                               | Yes                        |
| 53  | 2016             | Zhao Qianqian      | No                                                                    | Yes                          | Yes                      | Yes                                          | Yes                                     | Yes                                | Yes                      | Yes                               | Yes                        |
| 54  | 2014             | Zhou J             | No                                                                    | Yes                          | No                       | Yes                                          | Unclear                                 | Yes                                | Yes                      | Yes                               | No                         |
| 55  | 2017             | Dong Renjing       | No                                                                    | Yes                          | Yes                      | Yes                                          | No                                      | Yes                                | Yes                      | Yes                               | Yes                        |
| 56  | 2013             | Feng Fangfang      | No                                                                    | Yes                          | No                       | No                                           | Yes                                     | Yes                                | Yes                      | Yes                               | Yes                        |

| No.             | Publication year | First author | The 9 domains of Joanna Briggs Institute Critical Appraisal Checklist |                              |                          |                                              |                                         |                                    |                          |                                   |                            |
|-----------------|------------------|--------------|-----------------------------------------------------------------------|------------------------------|--------------------------|----------------------------------------------|-----------------------------------------|------------------------------------|--------------------------|-----------------------------------|----------------------------|
|                 |                  |              | Sample frame <sup>a</sup>                                             | Sampling method <sup>b</sup> | Sample size <sup>c</sup> | Subject and setting description <sup>d</sup> | Identified sample coverage <sup>e</sup> | Identification method <sup>f</sup> | Measurement <sup>g</sup> | Statistical analysis <sup>h</sup> | Response rate <sup>i</sup> |
| 57              | 2017             | Zhuang Xun   | No                                                                    | Yes                          | Yes                      | Yes                                          | Yes                                     | Yes                                | Yes                      | Yes                               | Yes                        |
| 58              | 2017             | Liu Yajun    | Yes                                                                   | No                           | Yes                      | No                                           | Yes                                     | Yes                                | Yes                      | Yes                               | Yes                        |
| 59              | 2013             | Sun Jianhua  | No                                                                    | Yes                          | Yes                      | No                                           | Yes                                     | Yes                                | Yes                      | Yes                               | Yes                        |
| 60              | 2018             | Yan Junmei   | No                                                                    | Yes                          | Yes                      | Yes                                          | Yes                                     | Yes                                | Yes                      | Yes                               | Yes                        |
| 61              | 2017             | Zeng Lixiang | No                                                                    | Yes                          | Yes                      | Yes                                          | Yes                                     | Yes                                | Yes                      | Yes                               | Yes                        |
| 62              | 2017             | Tan Jing     | No                                                                    | Yes                          | Yes                      | Yes                                          | Yes                                     | Yes                                | Yes                      | Yes                               | Yes                        |
| 63 <sup>j</sup> | 2017             | Guo Tongjun  | Yes                                                                   | Unclear                      | Yes                      | Yes                                          | Unclear                                 | Yes                                | Yes                      | Yes                               | Unclear                    |
| 64              | 2015             | Chen Ping    | No                                                                    | Yes                          | No                       | Yes                                          | Unclear                                 | Yes                                | Yes                      | Yes                               | Unclear                    |
| 65              | 2015             | Liu Lu       | No                                                                    | Yes                          | Yes                      | Yes                                          | Yes                                     | Yes                                | Yes                      | Yes                               | Yes                        |
| 66              | 2018             | Huang Xin    | Yes                                                                   | Yes                          | Yes                      | Yes                                          | Yes                                     | Yes                                | Yes                      | Yes                               | Yes                        |
| 67              | 2017             | Tang Wen     | Yes                                                                   | No                           | Yes                      | Yes                                          | No                                      | Yes                                | Yes                      | Yes                               | Yes                        |
| 68              | 2016             | Xu Rong      | Yes                                                                   | Yes                          | Yes                      | Yes                                          | Yes                                     | Yes                                | Yes                      | Yes                               | Yes                        |
| 69              | 2012             | Lu Rongxian  | No                                                                    | Yes                          | Yes                      | Yes                                          | Yes                                     | Yes                                | Yes                      | Yes                               | Yes                        |
| 70              | 2018             | Wang Xiaojie | No                                                                    | Yes                          | Yes                      | Yes                                          | Yes                                     | Yes                                | Yes                      | Yes                               | Yes                        |
| 71              | 2017             | Wang Shiwen  | Yes                                                                   | No                           | Yes                      | Yes                                          | Yes                                     | Yes                                | Yes                      | Yes                               | Yes                        |
| 72              | 2013             | Yi Lilan     | No                                                                    | Yes                          | Yes                      | Yes                                          | Yes                                     | Yes                                | Yes                      | Yes                               | Yes                        |
| 73              | 2016             | Du Huijuan   | No                                                                    | Yes                          | Yes                      | Yes                                          | Yes                                     | Yes                                | Yes                      | Yes                               | Yes                        |
| 74              | 2018             | Guo Tongjun  | Yes                                                                   | No                           | Yes                      | Yes                                          | No                                      | Yes                                | Yes                      | Yes                               | Yes                        |
| 75              | 2016             | Ding Jie     | No                                                                    | Yes                          | No                       | Yes                                          | Unclear                                 | Yes                                | Yes                      | Yes                               | No                         |

| No. | Publication year | First author  | The 9 domains of Joanna Briggs Institute Critical Appraisal Checklist |                              |                          |                                              |                                         |                                    |                          |                                   |                            |
|-----|------------------|---------------|-----------------------------------------------------------------------|------------------------------|--------------------------|----------------------------------------------|-----------------------------------------|------------------------------------|--------------------------|-----------------------------------|----------------------------|
|     |                  |               | Sample frame <sup>a</sup>                                             | Sampling method <sup>b</sup> | Sample size <sup>c</sup> | Subject and setting description <sup>d</sup> | Identified sample coverage <sup>e</sup> | Identification method <sup>f</sup> | Measurement <sup>g</sup> | Statistical analysis <sup>h</sup> | Response rate <sup>i</sup> |
| 76  | 2015             | Luo Xiaolin   | Yes                                                                   | No                           | Yes                      | Yes                                          | Yes                                     | Yes                                | Yes                      | Yes                               | Yes                        |
| 77  | 2018             | Liu Yiwen     | No                                                                    | Yes                          | No                       | Yes                                          | No                                      | Yes                                | Yes                      | Yes                               | Yes                        |
| 78  | 2017             | Kang Huixian  | No                                                                    | No                           | No                       | Yes                                          | Unclear                                 | Yes                                | Yes                      | Yes                               | Yes                        |
| 79  | 2019             | Yuan Xiaosong | No                                                                    | Yes                          | Yes                      | Yes                                          | Yes                                     | Yes                                | Yes                      | Yes                               | Yes                        |
| 80  | 2016             | Xue Qinqin    | No                                                                    | Yes                          | Yes                      | Yes                                          | Yes                                     | Yes                                | Yes                      | Yes                               | Yes                        |
| 81  | 2013             | Liu Jingli    | No                                                                    | Yes                          | Yes                      | No                                           | Yes                                     | Yes                                | Yes                      | Yes                               | Yes                        |
| 82  | 2018             | Xu Qin        | Yes                                                                   | No                           | Yes                      | No                                           | No                                      | Yes                                | Yes                      | Yes                               | Yes                        |
| 83  | 2013             | Ren Dafeng    | No                                                                    | Yes                          | Yes                      | Yes                                          | Yes                                     | Yes                                | Yes                      | Yes                               | Yes                        |
| 84  | 2014             | Shan Xiaoyi   | No                                                                    | Yes                          | Yes                      | Yes                                          | Yes                                     | Yes                                | Yes                      | Yes                               | Yes                        |
| 85  | 2016             | Yu Huiting    | Yes                                                                   | Yes                          | Yes                      | No                                           | Yes                                     | Yes                                | Yes                      | Yes                               | Yes                        |
| 86  | 2019             | Yan Huina     | No                                                                    | Yes                          | Yes                      | Yes                                          | Yes                                     | Yes                                | Yes                      | Yes                               | Yes                        |
| 87  | 2013             | Wang Chengshu | No                                                                    | Yes                          | Yes                      | Yes                                          | Yes                                     | Yes                                | Yes                      | Yes                               | Yes                        |
| 88  | 2017             | Li Shanshan   | No                                                                    | Yes                          | No                       | Yes                                          | Unclear                                 | Yes                                | Unclear                  | Yes                               | No                         |
| 89  | 2017             | Xin Qianqian  | Yes                                                                   | No                           | Yes                      | Yes                                          | Unclear                                 | Yes                                | Yes                      | Yes                               | Unclear                    |
| 90  | 2019             | Guan Tianjia  | No                                                                    | Yes                          | Yes                      | No                                           | Yes                                     | Yes                                | Yes                      | Yes                               | Yes                        |
| 91  | 2014             | Guo Yong      | Yes                                                                   | Yes                          | Yes                      | Yes                                          | Yes                                     | Yes                                | Yes                      | Yes                               | Yes                        |
| 92  | 2018             | Ye Lin        | Yes                                                                   | Yes                          | Yes                      | Yes                                          | Yes                                     | Yes                                | Yes                      | Yes                               | Yes                        |
| 93  | 2016             | Han Shujing   | No                                                                    | Yes                          | Yes                      | Yes                                          | Yes                                     | Yes                                | Yes                      | Yes                               | Yes                        |
| 94  | 2018             | Li Changchang | Yes                                                                   | Yes                          | Yes                      | Yes                                          | Yes                                     | Yes                                | Yes                      | Yes                               | Yes                        |

| No. | Publication year | First author | The 9 domains of Joanna Briggs Institute Critical Appraisal Checklist |                              |                          |                                              |                                         |                                    |                          |                                   |                            |
|-----|------------------|--------------|-----------------------------------------------------------------------|------------------------------|--------------------------|----------------------------------------------|-----------------------------------------|------------------------------------|--------------------------|-----------------------------------|----------------------------|
|     |                  |              | Sample frame <sup>a</sup>                                             | Sampling method <sup>b</sup> | Sample size <sup>c</sup> | Subject and setting description <sup>d</sup> | Identified sample coverage <sup>e</sup> | Identification method <sup>f</sup> | Measurement <sup>g</sup> | Statistical analysis <sup>h</sup> | Response rate <sup>i</sup> |
| 95  | 2019             | Yang M.      | Yes                                                                   | No                           | Yes                      | Yes                                          | Yes                                     | Yes                                | Yes                      | Yes                               | Yes                        |
| 96  | 2016             | Zhang Dandan | No                                                                    | Yes                          | Yes                      | Yes                                          | Yes                                     | Yes                                | Yes                      | Yes                               | Yes                        |
| 97  | 2015             | Yu Rong      | No                                                                    | Yes                          | Yes                      | No                                           | Yes                                     | Yes                                | Yes                      | Yes                               | Yes                        |
| 98  | 2018             | Zhao Jinqi   | Yes                                                                   | Yes                          | Yes                      | Yes                                          | Yes                                     | Yes                                | Yes                      | Yes                               | Yes                        |
| 99  | 2019             | Su Weijuan   | Yes                                                                   | Yes                          | Yes                      | Yes                                          | Yes                                     | Yes                                | Yes                      | Yes                               | Yes                        |
| 100 | 2013             | Zheng Feng   | No                                                                    | Yes                          | Yes                      | Yes                                          | Yes                                     | Yes                                | Yes                      | Yes                               | Yes                        |
| 101 | 2017             | Xia Min      | No                                                                    | Yes                          | Yes                      | Yes                                          | Yes                                     | Yes                                | Yes                      | Yes                               | Yes                        |
| 102 | 2018             | Xu Jing      | No                                                                    | Yes                          | Yes                      | No                                           | Yes                                     | Yes                                | Yes                      | Yes                               | Yes                        |
| 103 | 2017             | Wang Chen    | Yes                                                                   | No                           | Yes                      | Yes                                          | Yes                                     | Yes                                | Yes                      | Yes                               | Yes                        |
| 104 | 2018             | Li Xiangyu   | No                                                                    | Yes                          | Yes                      | Yes                                          | Yes                                     | Yes                                | Yes                      | Yes                               | Yes                        |
| 105 | 2019             | Wei Liangjia | No                                                                    | Yes                          | Yes                      | Yes                                          | Yes                                     | Yes                                | Yes                      | Yes                               | Yes                        |
| 106 | 2017             | Ye Juan      | No                                                                    | Yes                          | Yes                      | Yes                                          | Yes                                     | Yes                                | Yes                      | Yes                               | Yes                        |
| 107 | 2013             | Xu Hairong   | No                                                                    | Yes                          | No                       | No                                           | Yes                                     | Yes                                | Yes                      | Yes                               | Yes                        |
| 108 | 2019             | Lin Xianhua  | No                                                                    | Yes                          | Yes                      | Yes                                          | Yes                                     | Yes                                | Yes                      | Yes                               | Yes                        |
| 109 | 2017             | Hu Ronghua   | Yes                                                                   | Yes                          | Yes                      | Yes                                          | Yes                                     | Yes                                | Yes                      | Yes                               | No                         |
| 110 | 2015             | Bo Sun       | Yes                                                                   | Yes                          | Yes                      | No                                           | Yes                                     | Yes                                | Yes                      | Yes                               | Yes                        |
| 111 | 2019             | Guo Pi       | Yes                                                                   | Yes                          | Yes                      | Yes                                          | Yes                                     | Yes                                | Yes                      | Yes                               | Yes                        |
| 112 | 2019             | Liu Tao      | No                                                                    | Yes                          | Yes                      | Yes                                          | Unclear                                 | Yes                                | Yes                      | Yes                               | Unclear                    |
| 113 | 2018             | He Jianrong  | No                                                                    | Yes                          | Yes                      | Yes                                          | Yes                                     | Yes                                | Yes                      | Yes                               | Yes                        |

| No. | Publication year | First author   | The 9 domains of Joanna Briggs Institute Critical Appraisal Checklist |                              |                          |                                              |                                         |                                    |                          |                                   |                            |
|-----|------------------|----------------|-----------------------------------------------------------------------|------------------------------|--------------------------|----------------------------------------------|-----------------------------------------|------------------------------------|--------------------------|-----------------------------------|----------------------------|
|     |                  |                | Sample frame <sup>a</sup>                                             | Sampling method <sup>b</sup> | Sample size <sup>c</sup> | Subject and setting description <sup>d</sup> | Identified sample coverage <sup>e</sup> | Identification method <sup>f</sup> | Measurement <sup>g</sup> | Statistical analysis <sup>h</sup> | Response rate <sup>i</sup> |
| 114 | 2017             | Yang Wenjia    | No                                                                    | Yes                          | No                       | Yes                                          | Unclear                                 | Yes                                | Yes                      | Yes                               | Unclear                    |
| 115 | 2017             | Liu Shiping    | Yes                                                                   | Unclear                      | No                       | Yes                                          | Yes                                     | Yes                                | No                       | Yes                               | Yes                        |
| 116 | 2018             | Xiao Yue       | No                                                                    | Yes                          | No                       | No                                           | Yes                                     | Yes                                | Yes                      | Yes                               | Yes                        |
| 117 | 2013             | Li Guijuan     | No                                                                    | Yes                          | Yes                      | Yes                                          | Yes                                     | Yes                                | Yes                      | Yes                               | Yes                        |
| 118 | 2019             | Dai Xiaowei    | No                                                                    | Yes                          | No                       | Yes                                          | Unclear                                 | Yes                                | Yes                      | Yes                               | Unclear                    |
| 119 | 2018             | Wang Chen      | No                                                                    | Yes                          | Yes                      | Yes                                          | Yes                                     | Yes                                | Yes                      | Yes                               | Yes                        |
| 120 | 2018             | Tang Jiangbing | No                                                                    | Yes                          | Yes                      | Yes                                          | Yes                                     | Yes                                | Yes                      | Yes                               | Yes                        |
| 121 | 2017             | Li Run         | No                                                                    | Yes                          | No                       | Yes                                          | Yes                                     | Yes                                | Yes                      | Yes                               | Yes                        |
| 122 | 2018             | Wang Yaocheng  | Yes                                                                   | Yes                          | Yes                      | Yes                                          | Yes                                     | Yes                                | Yes                      | Yes                               | Yes                        |
| 123 | 2015             | Pan Lei        | Yes                                                                   | Yes                          | Yes                      | Yes                                          | Yes                                     | Yes                                | Yes                      | Yes                               | Yes                        |
| 124 | 2019             | Hu Jie         | No                                                                    | Yes                          | Yes                      | Yes                                          | No                                      | Yes                                | Yes                      | Yes                               | No                         |
| 125 | 2018             | Xiao Qingyang  | Yes                                                                   | Yes                          | Yes                      | Yes                                          | Yes                                     | Yes                                | Yes                      | Yes                               | Yes                        |
| 126 | 2014             | He Jifei       | No                                                                    | Yes                          | Yes                      | No                                           | Yes                                     | Yes                                | Yes                      | Yes                               | Yes                        |
| 127 | 2015             | Xue Xiaoping   | Yes                                                                   | Yes                          | Yes                      | Yes                                          | Yes                                     | Yes                                | Yes                      | Yes                               | Yes                        |
| 128 | 2014             | Xu Xin         | Yes                                                                   | Yes                          | Yes                      | Yes                                          | Yes                                     | Yes                                | Yes                      | Yes                               | Yes                        |
| 129 | 2012             | Yang Qing      | No                                                                    | Yes                          | Yes                      | Yes                                          | Yes                                     | Yes                                | Yes                      | Yes                               | Yes                        |
| 130 | 2016             | Long Xinzhi    | No                                                                    | Yes                          | Yes                      | No                                           | Unclear                                 | Yes                                | Yes                      | Yes                               | Unclear                    |
| 131 | 2013             | Guo Yawei      | No                                                                    | Yes                          | Yes                      | Yes                                          | No                                      | Yes                                | Yes                      | Yes                               | Yes                        |
| 132 | 2015             | Zhang Cuihong  | No                                                                    | Yes                          | Yes                      | Yes                                          | Yes                                     | Yes                                | Yes                      | Yes                               | Yes                        |



| No. | Publication year | First author   | The 9 domains of Joanna Briggs Institute Critical Appraisal Checklist |                              |                          |                                              |                                         |                                    |                          |                                   |                            |         |
|-----|------------------|----------------|-----------------------------------------------------------------------|------------------------------|--------------------------|----------------------------------------------|-----------------------------------------|------------------------------------|--------------------------|-----------------------------------|----------------------------|---------|
|     |                  |                | Sample frame <sup>a</sup>                                             | Sampling method <sup>b</sup> | Sample size <sup>c</sup> | Subject and setting description <sup>d</sup> | Identified sample coverage <sup>e</sup> | Identification method <sup>f</sup> | Measurement <sup>g</sup> | Statistical analysis <sup>h</sup> | Response rate <sup>i</sup> |         |
| 133 | 2019             | Zhu Beibei     | No                                                                    | Yes                          | Yes                      | Yes                                          | Yes                                     | Yes                                | Yes                      | Yes                               | Yes                        | Yes     |
| 134 | 2018             | Ding Haiyan    | Yes                                                                   | Yes                          | Yes                      | Yes                                          | Yes                                     | Yes                                | Yes                      | Yes                               | Yes                        | Yes     |
| 135 | 2016             | Wang Fen       | No                                                                    | Yes                          | Yes                      | Yes                                          | Yes                                     | Yes                                | Yes                      | Yes                               | Yes                        | Yes     |
| 136 | 2019             | Ma Haihui      | No                                                                    | Yes                          | Yes                      | Yes                                          | Unclear                                 | Yes                                | Yes                      | Yes                               | Yes                        | No      |
| 137 | 2015             | Zhou Miao      | Yes                                                                   | Yes                          | Yes                      | Yes                                          | Yes                                     | Yes                                | Yes                      | Yes                               | Yes                        | Yes     |
| 138 | 2018             | Tian Jiarong   | Yes                                                                   | Yes                          | Yes                      | Yes                                          | Yes                                     | Yes                                | Yes                      | Yes                               | Yes                        | Yes     |
| 139 | 2017             | Zhao Yanjie    | Yes                                                                   | Yes                          | Yes                      | Yes                                          | Yes                                     | Yes                                | Yes                      | Yes                               | Yes                        | Yes     |
| 140 | 2018             | Wang H.        | Yes                                                                   | Yes                          | Yes                      | Yes                                          | Yes                                     | Yes                                | Yes                      | Yes                               | Yes                        | Yes     |
| 141 | 2018             | Hu Chengyang   | Yes                                                                   | Yes                          | Yes                      | Yes                                          | No                                      | Yes                                | Yes                      | Yes                               | Yes                        | Yes     |
| 142 | 2018             | Zheng Wei      | No                                                                    | Yes                          | Yes                      | Yes                                          | Yes                                     | Yes                                | Yes                      | Yes                               | Yes                        | Yes     |
| 143 | 2018             | Huang Aiqun    | Yes                                                                   | Yes                          | Yes                      | Yes                                          | Yes                                     | Yes                                | Yes                      | Yes                               | Yes                        | Yes     |
| 144 | 2014             | Fei Lixiao     | Yes                                                                   | Yes                          | Yes                      | No                                           | Yes                                     | Yes                                | Yes                      | Yes                               | Yes                        | Yes     |
| 145 | 2017             | Fang Haiqin    | Yes                                                                   | Yes                          | Yes                      | Yes                                          | Yes                                     | Yes                                | Yes                      | Yes                               | Yes                        | Yes     |
| 146 | 2018             | Yang Jin       | No                                                                    | No                           | Yes                      | Yes                                          | Unclear                                 | Yes                                | Yes                      | Yes                               | Yes                        | No      |
| 147 | 2015             | Wen Tingyuan   | No                                                                    | Yes                          | Yes                      | Yes                                          | Unclear                                 | Yes                                | Yes                      | Yes                               | Yes                        | Unclear |
| 148 | 2015             | Jia Xiaomin    | No                                                                    | Yes                          | Yes                      | Yes                                          | Unclear                                 | Yes                                | Yes                      | Yes                               | Yes                        | No      |
| 149 | 2014             | Chen Liangmiao | No                                                                    | Yes                          | Yes                      | Yes                                          | Unclear                                 | Yes                                | Yes                      | Yes                               | Yes                        | Unclear |
| 150 | 2017             | Fan Xiaojing   | No                                                                    | Yes                          | No                       | Yes                                          | No                                      | Yes                                | Yes                      | Yes                               | Yes                        | Yes     |
| 151 | 2019             | Fang Jing      | No                                                                    | Yes                          | No                       | Yes                                          | Yes                                     | Yes                                | Yes                      | Yes                               | Yes                        | Yes     |

| No.                  | Publication year | First author | The 9 domains of Joanna Briggs Institute Critical Appraisal Checklist |                              |                          |                                              |                                         |                                    |                          |                                   |                            |
|----------------------|------------------|--------------|-----------------------------------------------------------------------|------------------------------|--------------------------|----------------------------------------------|-----------------------------------------|------------------------------------|--------------------------|-----------------------------------|----------------------------|
|                      |                  |              | Sample frame <sup>a</sup>                                             | Sampling method <sup>b</sup> | Sample size <sup>c</sup> | Subject and setting description <sup>d</sup> | Identified sample coverage <sup>e</sup> | Identification method <sup>f</sup> | Measurement <sup>g</sup> | Statistical analysis <sup>h</sup> | Response rate <sup>i</sup> |
| 152                  | 2014             | Li Yanhua    | No                                                                    | Yes                          | No                       | Yes                                          | Yes                                     | Yes                                | Yes                      | Yes                               | Yes                        |
| 153                  | 2019             | Li Minmin    | Yes                                                                   | Yes                          | Yes                      | Yes                                          | Yes                                     | Yes                                | Yes                      | Yes                               | Yes                        |
| 154                  | 2016             | Hu Yan       | No                                                                    | Yes                          | Yes                      | Yes                                          | Yes                                     | Yes                                | Yes                      | Yes                               | Yes                        |
| 155                  | 2016             | Jin Wenyuan  | No                                                                    | Yes                          | No                       | Yes                                          | Yes                                     | Yes                                | Yes                      | Yes                               | Yes                        |
| 156                  | 2018             | Zhao Xiang   | No                                                                    | Yes                          | No                       | Yes                                          | Yes                                     | Yes                                | Yes                      | Yes                               | Yes                        |
| 157 <sup>j</sup>     | 2017             | Guo Tongjun  | Yes                                                                   | Unclear                      | Yes                      | No                                           | Unclear                                 | Yes                                | Yes                      | Yes                               | Unclear                    |
| 158                  | 2016             | Guo Yanwei   | No                                                                    | Yes                          | Yes                      | Yes                                          | Yes                                     | Yes                                | Yes                      | Yes                               | Yes                        |
| 159                  | 2014             | Wang Jing    | No                                                                    | Yes                          | Yes                      | No                                           | Yes                                     | Yes                                | Yes                      | Yes                               | Yes                        |
| 160                  | 2016             | Jiang Yan    | No                                                                    | Yes                          | Yes                      | Yes                                          | Yes                                     | Yes                                | Yes                      | Yes                               | Yes                        |
| 161                  | 2013             | Wang Mei     | No                                                                    | Unclear                      | No                       | No                                           | No                                      | Yes                                | Yes                      | Yes                               | Unclear                    |
| 162                  | 2019             | Wang Feixue  | Yes                                                                   | No                           | Yes                      | No                                           | No                                      | Yes                                | Yes                      | Yes                               | Yes                        |
| Consistency rate (%) |                  |              | 84.0                                                                  | 80.9                         | 96.9                     | 72.2                                         | 75.3                                    | 92.6                               | 94.4                     | 932                               | 80.3                       |

<sup>a</sup> The target population should be addressed appropriately with the sample frame. “Yes” for the census, studies with individual sample from whole population, and studies with cluster sample from all hospitals.

<sup>b</sup> Study participants should be recruited in an appropriate way. “Yes” for the census and studies with random samples.

<sup>c</sup> The sample size should be adequate. “Yes” for sample size  $\geq 2000$ .

<sup>d</sup> The study subjects and setting should be described in detail. “Yes” for studies with sufficient details on subjects and settings.

<sup>e</sup> Data analysis should be conducted with sufficient coverage of the identified sample. “Yes” for same response rate among different subgroup sample.

<sup>f</sup> Valid methods should be used for the identification of the condition. “Yes” for studies using an upper boundary of 37 gestational weeks to define preterm delivery.

<sup>g</sup> The condition should be measured in a standard, reliable way for all participants. “Yes” for population-based studies with reliable measurement of gestational weeks and hospital-based studies.

<sup>h</sup> Statistical analysis should be appropriate. “Yes” for studies from which the numerator and denominator of preterm delivery can be directly obtained.

<sup>i</sup> The response rate should be adequate, and if not, the low response rate should be managed appropriately. “Yes” for studies with response rate not less than 85%.

<sup>j</sup> See eText2 by No. for details on two studies with same publication year and first author.

**eTable4. Stratified analysis within population-based studies (n=37)**

|                        | Number of records | Participants | Rate (%; 95% CI) | $I^2$ (%; 95% CI); $P_{\text{heterogeneity}}^a$ | $P_{\text{between-subgroup}}^a$ |
|------------------------|-------------------|--------------|------------------|-------------------------------------------------|---------------------------------|
| <b>Total studies</b>   | 37                | 11728601     | 4.9 (4.5, 5.4)   | 99.91 (99.90, 99.91); <0.001                    | -                               |
| <b>Language</b>        |                   |              |                  |                                                 |                                 |
| Chinese                | 19                | 3072375      | 4.8 (4.0, 5.9)   | 99.92 (99.91, 99.92); <0.001                    | 0.621                           |
| English                | 18                | 8656226      | 5.1 (4.6, 5.6)   | 99.89 (99.88, 99.90); <0.001                    |                                 |
| <b>Study year</b>      |                   |              |                  |                                                 |                                 |
| 2010                   | 2                 | 140725       | 6.8 (2.7, 16.9)  | 99.94 (99.92, 99.95); <0.001                    | 0.747                           |
| 2011                   | 6                 | 630321       | 4.7 (3.8, 5.8)   | 97.73 (96.58, 98.50); <0.001                    |                                 |
| 2012                   | 10                | 1987749      | 5.5 (4.7, 6.4)   | 99.84 (99.82, 99.86); <0.001                    |                                 |
| 2013                   | 4                 | 422577       | 5.2 (3.5, 7.7)   | 99.85 (99.82, 99.88); <0.001                    |                                 |
| 2014                   | 7                 | 1865922      | 4.4 (3.4, 5.5)   | 99.83 (99.80, 99.85); <0.001                    |                                 |
| 2015                   | 6                 | 6143832      | 5.0 (4.3, 5.9)   | 99.89 (99.88, 99.91); <0.001                    |                                 |
| 2016                   | 2                 | 537475       | 3.4 (0.7, 15.7)  | 99.96 (99.96, 99.97); <0.001                    |                                 |
| <b>Singleton only</b>  |                   |              |                  |                                                 |                                 |
| Yes                    | 17                | 3271289      | 5.0 (4.3, 5.7)   | 99.87 (99.85, 99.88); <0.001                    | 0.927                           |
| No                     | 20                | 8457312      | 4.9 (4.3, 5.6)   | 99.93 (99.93, 99.93); <0.001                    |                                 |
| <b>Lower boundary</b>  |                   |              |                  |                                                 |                                 |
| 28                     | 11                | 5412113      | 4.7 (4.1, 5.4)   | 99.66 (99.61, 99.71); <0.001                    | 0.868                           |
| 27 or less             | 7                 | 1914916      | 4.6 (3.9, 5.5)   | 99.84 (99.82, 99.86); <0.001                    |                                 |
| <b>Live birth only</b> |                   |              |                  |                                                 |                                 |

|                                   | Number of records | Participants | Rate (%; 95% CI) | $I^2$ (%; 95% CI); $P_{\text{heterogeneity}}^a$ | $P_{\text{between-subgroup}}^a$ |
|-----------------------------------|-------------------|--------------|------------------|-------------------------------------------------|---------------------------------|
| Yes                               | 28                | 6040468      | 5.1 (4.5, 5.7)   | 99.91 (99.90, 99.91); <0.001                    | 0.812                           |
| No                                | 4                 | 5033469      | 4.9 (3.6, 6.7)   | 99.83 (99.79, 99.86); <0.001                    |                                 |
| <b>Unit of analysis</b>           |                   |              |                  |                                                 |                                 |
| Woman                             | 21                | 6382219      | 4.7 (4.0, 5.6)   | 99.90 (99.90, 99.91); <0.001                    | 0.396                           |
| Neonate                           | 16                | 5346382      | 5.2 (4.6, 5.9)   | 99.91 (99.91, 99.92); <0.001                    |                                 |
| <b>Region</b>                     |                   |              |                  |                                                 |                                 |
| Total studies                     | 34 <sup>b</sup>   | 5837273      | 4.9 (4.4, 5.5)   | 99.88 (99.88, 99.89); <0.001                    | -                               |
| Eastern China                     | 20                | 4675952      | 5.3 (4.6, 6.2)   | 99.92 (99.91, 99.92); <0.001                    | 0.066                           |
| Central China                     | 9                 | 728328       | 4.6 (3.6, 6.0)   | 99.77 (99.73, 99.80); <0.001                    |                                 |
| Western China                     | 5                 | 432993       | 3.8 (2.9, 4.9)   | 98.46 (97.68, 98.97); <0.001                    |                                 |
| <b>Sample Size</b>                |                   |              |                  |                                                 |                                 |
| Yes                               | 33                | 11725239     | 4.9 (4.4, 5.3)   | 99.92 (99.92, 99.92); <0.001                    | 0.377                           |
| No                                | 4                 | 3362         | 5.9 (3.8, 9.2)   | 90.64 (79.07, 95.81); <0.001                    |                                 |
| <b>Identified sample coverage</b> |                   |              |                  |                                                 |                                 |
| Yes                               | 27                | 5028856      | 5.0 (4.6, 5.5)   | 99.78 (99.76, 99.80); <0.001                    | 0.294                           |
| No                                | 7                 | 6399000      | 4.3 (3.3, 5.7)   | 99.97 (99.96, 99.97); <0.001                    |                                 |
| <b>Response rate</b>              |                   |              |                  |                                                 |                                 |
| Yes                               | 33                | 11110393     | 4.9 (4.5, 5.3)   | 99.91 (99.90, 99.91); <0.001                    | 0.573                           |
| No                                | 1                 | 317463       | 5.0 (4.9, 5.1)   | -                                               |                                 |

<sup>a</sup> Tested by Cochrane Q.

<sup>b</sup> Studies covered more than one region without obtainable region-specific data were not included in region stratified analysis.

**eTable5. Stratified analysis within hospital-based studies (n=124)**

|                         | Number of records | Participants | Rate (%; 95% CI) | $I^2$ (%; 95% CI); $P_{\text{heterogeneity}}^a$ | $P_{\text{between-subgroup}}^a$ |
|-------------------------|-------------------|--------------|------------------|-------------------------------------------------|---------------------------------|
| <b>Total studies</b>    | 124               | 6171419      | 7.2 (6.9, 7.6)   | 99.53 (99.50, 99.55); <0.001                    | -                               |
| <b>Study year</b>       |                   |              |                  |                                                 |                                 |
| 2010                    | 12                | 161366       | 5.5 (4.6, 6.5)   | 98.21 (97.69, 98.62); <0.001                    | 0.006                           |
| 2011                    | 27                | 496240       | 7.4 (6.5, 8.3)   | 99.36 (99.28, 99.43); <0.001                    |                                 |
| 2012                    | 23                | 561104       | 8.4 (7.5, 9.3)   | 99.32 (99.22, 99.40); <0.001                    |                                 |
| 2013                    | 22                | 4279003      | 7.2 (6.5, 8.0)   | 99.36 (99.26, 99.44); <0.001                    |                                 |
| 2014                    | 15                | 302009       | 7.0 (5.7, 8.6)   | 99.51 (99.43, 99.57); <0.001                    |                                 |
| 2015                    | 14                | 214677       | 7.7 (6.2, 9.5)   | 99.57 (99.50, 99.63); <0.001                    |                                 |
| 2016                    | 7                 | 108018       | 6.8 (5.3, 8.8)   | 98.51 (97.93, 98.93); <0.001                    |                                 |
| 2017                    | 4                 | 49002        | 5.7 (3.9, 8.3)   | 99.01 (98.52, 99.34); <0.001                    |                                 |
| <b>Singleton only</b>   |                   |              |                  |                                                 |                                 |
| Yes                     | 58                | 704214       | 6.9 (6.2, 7.7)   | 99.41 (99.37, 99.46); <0.001                    | 0.284                           |
| No                      | 66                | 5467205      | 7.4 (7.0, 7.9)   | 99.56 (99.53, 99.59); <0.001                    |                                 |
| <b>Lower boundary</b>   |                   |              |                  |                                                 |                                 |
| 28                      | 55                | 4582634      | 7.2 (6.7, 7.8)   | 99.36 (99.31, 99.41); <0.001                    | <0.001                          |
| 27 or less              | 24                | 937863       | 9.4 (8.4, 10.3)  | 99.58 (99.53, 99.62); <0.001                    |                                 |
| <b>Live birth only</b>  |                   |              |                  |                                                 |                                 |
| Yes                     | 82                | 5552503      | 7.2 (6.8, 7.7)   | 99.57 (99.55, 99.60); <0.001                    | 0.413                           |
| No                      | 16                | 353142       | 7.8 (6.6, 9.1)   | 99.43 (99.33, 99.51); <0.001                    |                                 |
| <b>Unit of analysis</b> |                   |              |                  |                                                 |                                 |

|                       | Number of records | Participants | Rate (%; 95% CI) | $I^2$ (%; 95% CI); $P_{\text{heterogeneity}}^a$ | $P_{\text{between-subgroup}}^a$ |
|-----------------------|-------------------|--------------|------------------|-------------------------------------------------|---------------------------------|
| Woman                 | 88                | 901221       | 6.7 (6.1, 7.3)   | 99.24 (99.18, 99.29); <0.001                    | <0.001                          |
| Neonate               | 36                | 5270198      | 8.5 (7.9, 9.3)   | 99.76 (99.74, 99.78); <0.001                    |                                 |
| <b>Hospital level</b> |                   |              |                  |                                                 |                                 |
| Tertiary              | 68                | 708531       | 8.0 (7.2, 8.8)   | 99.37 (99.32, 99.42); <0.001                    | 0.001                           |
| Secondary             | 14                | 172240       | 4.9 (3.8, 6.3)   | 99.27 (99.13, 99.39); <0.001                    |                                 |
| <b>Region</b>         |                   |              |                  |                                                 |                                 |
| Total studies         | 134 <sup>b</sup>  | 1329755      | 7.4 (6.9, 7.9)   | 99.33 (99.29, 99.37); <0.001                    | -                               |
| Northeastern China    | 8                 | 35147        | 8.7 (5.8, 13.0)  | 99.24 (99.03, 99.40); <0.001                    | 0.703                           |
| Eastern China         | 75                | 984762       | 7.1 (6.5, 7.8)   | 99.46 (99.43, 99.50); <0.001                    |                                 |
| Central China         | 26                | 129146       | 7.6 (6.1, 9.5)   | 99.21 (99.09, 99.30); <0.001                    |                                 |
| Western China         | 25                | 180700       | 7.6 (6.6, 8.7)   | 98.59 (98.34, 98.80); <0.001                    |                                 |

<sup>a</sup> Tested by Cochrane Q.

<sup>b</sup> Studies covered more than one region without obtainable region-specific data were not included in region stratified analysis.

**eTable6. Province-level pooled rates and nationwide weighted rate**

| Study setting   | Number of records <sup>a</sup> | Participants | Rate (%; 95% CI) <sup>b</sup> | Number of live births <sup>c</sup> | Estimated number of preterm deliveries |
|-----------------|--------------------------------|--------------|-------------------------------|------------------------------------|----------------------------------------|
| Anhui           | 1                              | 16983        | 3.9 (3.6, 4.2)                | 6638456                            | 256423                                 |
| Beijing         | 1                              | 1366377      | 5.5 (5.5, 5.5)                | 1358237                            | 74547                                  |
| Fujian          | 1                              | 62852        | 5.3 (5.2, 5.5)                | 4581584                            | 244198                                 |
| Guangdong       | 4                              | 1741790      | 6.3 (5.5, 7.2)                | 12798165                           | 800819                                 |
| Guangxi         | 1                              | 10122        | 4.0 (3.6, 4.4)                | 7112152                            | 283868                                 |
| Hainan          | 1                              | 89854        | 10.8 (10.6, 11.0)             | 1058478                            | 114325                                 |
| Hebei           | 2                              | 68711        | 8.2 (6.3, 10.7)               | 8604691                            | 703731                                 |
| Hebei, Liaoning | 1                              | 16691        | 3.8 (3.6, 4.1)                | 2716689 <sup>d</sup>               | 104169                                 |
| Henan           | 2                              | 263425       | 3.2 (2.3, 4.4)                | 13354764                           | 430761                                 |
| Hubei           | 1                              | 317463       | 5.0 (4.9, 5.1)                | 5698488                            | 285209                                 |
| Hunan           | 4                              | 79586        | 6.0 (4.9, 7.3)                | 7180633                            | 427266                                 |
| Jiangsu         | 5                              | 345150       | 4.8 (3.4, 6.7)                | 6744659                            | 322902                                 |
| Shaanxi         | 2                              | 412817       | 3.9 (2.5, 6.3)                | 3525820                            | 138954                                 |
| Shanghai        | 2                              | 323883       | 5.4 (3.6, 7.9)                | 1039668                            | 55876                                  |
| Shanxi          | 1                              | 50871        | 4.3 (4.1, 4.4)                | 3153449                            | 134082                                 |
| Sichuan, Yunnan | 1                              | 9353         | 3.5 (3.2, 3.9)                | 12156002 <sup>e</sup>              | 426298                                 |
| Tianjin         | 1                              | 17545        | 4.6 (4.3, 4.9)                | 864963                             | 39588                                  |
| Tibet           | 1                              | 701          | 3.3 (2.2, 4.9)                | 411515                             | 13502                                  |
| Zhejiang        | 3                              | 659790       | 3.1 (1.4, 7.0)                | 4297752                            | 132518                                 |



|                          |                       |         |
|--------------------------|-----------------------|---------|
| Sum                      | 103296165             | 4989035 |
| <b>Weighted rate (%)</b> | <b>4.8 (4.0, 5.9)</b> |         |

<sup>a</sup> Studies with nationwide samples were not included as their province-level data were unobtainable.

<sup>b</sup> Rates for settings with records  $\geq 2$  were pooled using the random-effects model, and records in each corresponding group were highly heterogeneous with  $I^2$ 's ranging from 82.35% to 99.95%.

<sup>c</sup> Accumulated from 2010 to 2018 according to China Health Statistical Yearbook.

<sup>d</sup> Only data of Liaoning were used since a study purely from Hebei was already included.

<sup>e</sup> Including data from Sichuan and Yunnan.

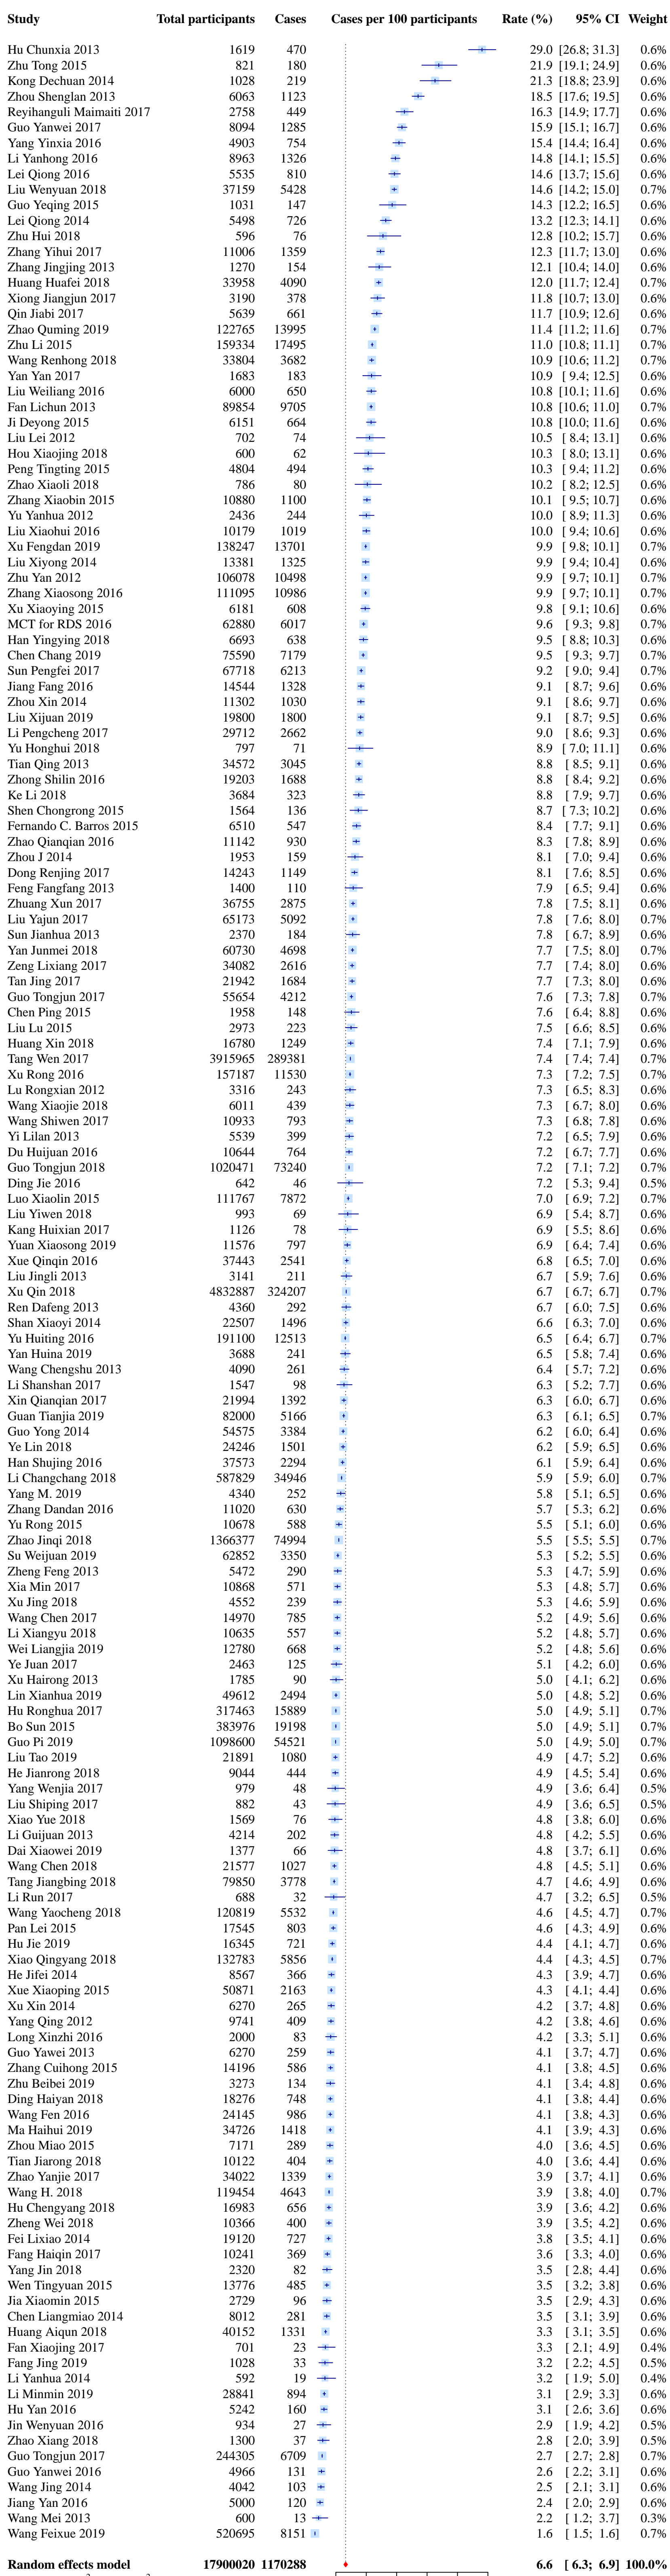

Figure 1. Forest plot of all the included studies (n=161)

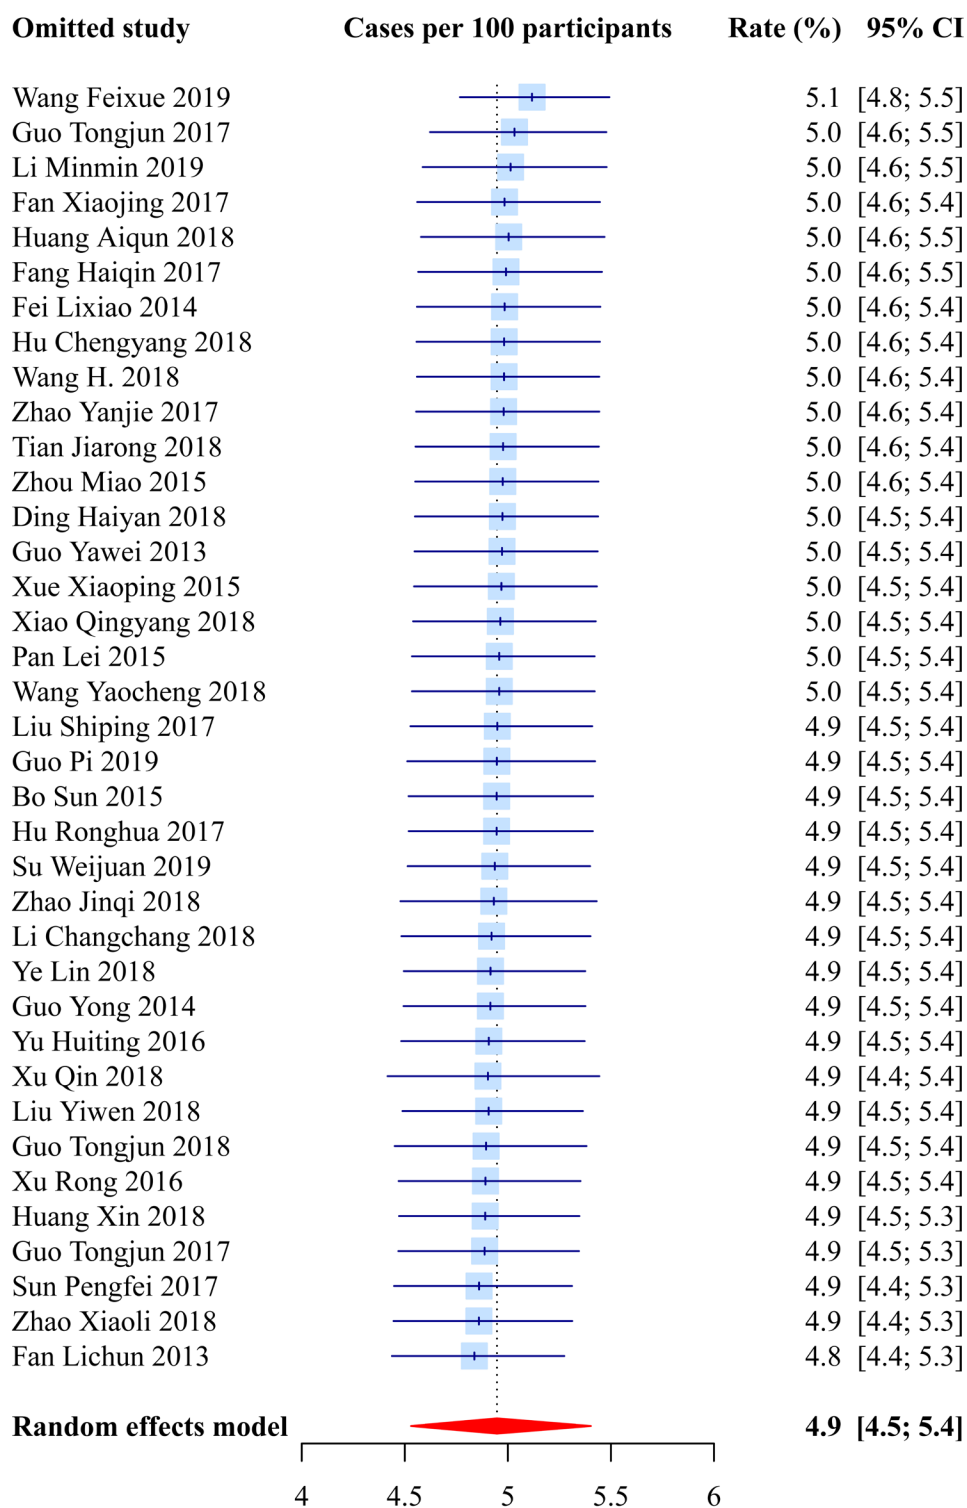

**eFigure2. Sensitivity analysis within population-based studies (n=37)**
